# Supplementary material
Source: publisher site journal article supplement (https://static.cambridge.org/content/id/urn:cambridge.org:id:article:S0016756819000013/resource/name/S0016756819000013supp001.doc)
Supplement: Supplementary file 1 [file S0016756819000013supp001.doc]

Supplementary Table 1 Major (wt %) and trace element (ppm) data for clastic sedimentary rocks from Jinggangshan area, Cathaysia Block

| **Sample** | **P36-01** | **P36-02** | **P36-03** | **P36-04** | **P38-01** | **P39-01** | **P39-02** | **P40-01** | **P40-02** | **P41-01** | **P42-01** | **P43-01** | **P45-01** |
| --- | --- | --- | --- | --- | --- | --- | --- | --- | --- | --- | --- | --- | --- |
| Rock type | Cambrian Sandstone | Cambrian Sandstone | Cambrian Mudstone | Cambrian Mudstone | Cambrian Sandstone | Cambrian Sandstone | Cambrian Sandstone | Cambrian Sandstone | Cambrian Mudstone | Sinian  Sandstone | Sinian  Sandstone | Sinian  Sandstone | Cambrian Mudstone |
| SiO2 | 53.41 | 75.68 | 56.85 | 54.58 | 58.01 | 72.58 | 78.02 | 70.35 | 47.19 | 73.01 | 70.02 | 74.01 | 58.69 |
| TiO2 | 0.92 | 0.61 | 0.77 | 0.83 | 0.87 | 0.58 | 0.56 | 0.57 | 0.91 | 0.50 | 0.57 | 0.59 | 0.84 |
| Al2O3 | 20.75 | 10.32 | 19.55 | 20.62 | 20.02 | 11.66 | 9.05 | 11.00 | 24.76 | 11.78 | 12.24 | 11.13 | 20.09 |
| Fe2O3 | 9.05 | 5.03 | 8.34 | 8.97 | 6.69 | 5.07 | 4.40 | 4.59 | 8.17 | 4.54 | 5.53 | 4.77 | 4.48 |
| MnO | 0.08 | 0.04 | 0.05 | 0.06 | 0.02 | 0.06 | 0.04 | 0.07 | 0.07 | 0.05 | 0.05 | 0.05 | 0.05 |
| MgO | 2.77 | 1.43 | 2.57 | 2.79 | 2.02 | 1.39 | 1.20 | 1.65 | 3.46 | 1.26 | 2.07 | 1.64 | 2.64 |
| CaO | 0.05 | 0.43 | 0.00 | 0.02 | 0.01 | 0.06 | 0.15 | 2.44 | 0.48 | 0.05 | 0.87 | 0.28 | 0.01 |
| Na2O | 0.22 | 0.20 | 0.23 | 0.23 | 0.28 | 1.34 | 1.39 | 1.92 | 0.72 | 1.84 | 1.87 | 1.50 | 0.26 |
| K2O | 6.11 | 1.78 | 5.39 | 5.91 | 6.08 | 2.74 | 1.96 | 2.70 | 8.72 | 3.26 | 3.10 | 3.10 | 6.38 |
| P2O5 | 0.44 | 0.32 | 0.01 | 0.01 | 0.01 | 0.10 | 0.01 | 0.09 | 0.14 | 0.08 | 0.26 | 0.01 | 0.04 |
| LOI | 5.94 | 4.08 | 6.11 | 5.81 | 5.85 | 4.27 | 3.03 | 4.56 | 5.28 | 3.45 | 3.31 | 2.80 | 6.36 |
| Total | 99.74 | 99.92 | 99.88 | 99.84 | 99.85 | 99.86 | 99.80 | 99.93 | 99.91 | 99.83 | 99.87 | 99.87 | 99.84 |
| CIA | 74.55 | 77.29 | 75.85 | 75.09 | 73.92 | 68.79 | 65.87 | 68.23 | 55.79 | 63.87 | 60.44 | 63.71 | 73.18 |
| PIA | 96.88 | 88.36 | 97.31 | 97.09 | 96.64 | 78.96 | 72.98 | 88.12 | 58.23 | 72.52 | 65.63 | 72.30 | 96.74 |
| Li | 62.6 | 59.3 | 77.5 | 55.3 | 53.8 | 22.1 | 20.9 | 25.7 | 55.7 | 19.4 | 33.6 | 31.2 | 54.8 |
| Be | 6.36 | 2.39 | 4.57 | 4.89 | 6.08 | 2.98 | 1.73 | 2.21 | 8.77 | 2.36 | 2.36 | 2.29 | 4.73 |
| Sc | 16.2 | 8.51 | 15.3 | 17.0 | 17.9 | 10.8 | 10.7 | 10.3 | 23.0 | 10.8 | 11.0 | 11.3 | 17.5 |
| V | 170 | 63.7 | 137 | 147 | 150 | 70.2 | 64.7 | 68.2 | 187 | 64.5 | 70.4 | 68.0 | 160 |
| Cr | 97 | 59.8 | 107 | 113 | 114 | 62.7 | 57.8 | 56.8 | 102 | 58.7 | 57.3 | 58.1 | 107 |
| Co | 15.1 | 8.39 | 10.1 | 13.4 | 3.72 | 7.08 | 7.11 | 10.3 | 17.2 | 8.12 | 6.91 | 9.97 | 3.70 |
| Ni | 39.1 | 26.9 | 48.1 | 39.8 | 32.7 | 29.3 | 20.5 | 24.3 | 52.3 | 27.1 | 21.8 | 20.2 | 26.6 |
| Cu | 32.8 | 28.6 | 54.8 | 52.0 | 40.4 | 35.7 | 25.7 | 26.0 | 19 | 22.3 | 25.1 | 25.9 | 24.7 |
| Zn | 154 | 129 | 148 | 140 | 107 | 163 | 94.5 | 81.6 | 144 | 94.9 | 103 | 69.9 | 75.6 |
| Ga | 16.4 | 15.4 | 18.2 | 12.5 | 13.1 | 17.4 | 13.9 | 15.4 | 15.5 | 15.8 | 16.4 | 16.0 | 11.2 |
| Rb | 257 | 81.7 | 224 | 242 | 254 | 120 | 89.0 | 105 | 342 | 121 | 111 | 114 | 256 |
| Sr | 23.1 | 22.7 | 17.1 | 22.3 | 24.8 | 51.1 | 65.9 | 68 | 39.7 | 97.3 | 87.9 | 52.7 | 24.5 |
| Y | 33.5 | 55.2 | 27.9 | 42.4 | 28.3 | 42.8 | 32.0 | 28.5 | 38.8 | 32.9 | 31.5 | 29.5 | 34.6 |
| Zr | 202 | 335 | 167 | 175 | 192 | 273 | 342 | 257 | 173 | 233 | 252 | 291 | 197 |
| Nb | 21.3 | 13.6 | 17.3 | 18.2 | 19.2 | 13.6 | 14.3 | 12.6 | 20.1 | 12.9 | 12.4 | 13.2 | 17.1 |
| Mo | 2.32 | 0.658 | 1.63 | 4.29 | 1.40 | 0.425 | 0.481 | 3.13 | 0.166 | 0.152 | 16.1 | 0.606 | 2.21 |
| Cd | 0.426 | 0.199 | 0.205 | 0.512 | 0.165 | 0.315 | 0.179 | 0.156 | 0.349 | 2.05 | 0.167 | 0.058 | 0.050 |
| Cs | 14.7 | 5.70 | 11.1 | 12.5 | 11.0 | 3.71 | 3.22 | 3.49 | 16.7 | 4.81 | 5.74 | 4.10 | 12.1 |
| Ba | 963 | 360 | 556 | 836 | 961 | 680 | 460 | 495 | 1083 | 518 | 542 | 596 | 855 |
| La | 53.7 | 49.6 | 43.7 | 63.2 | 66.4 | 71.2 | 49.8 | 39.4 | 61.5 | 45.1 | 41.7 | 46.4 | 48.7 |
| Ce | 108 | 106 | 85.1 | 114 | 106 | 93.8 | 88.3 | 77.2 | 121 | 80.7 | 81.6 | 91.0 | 93.8 |
| Pr | 12.1 | 12.7 | 9.90 | 14.0 | 14.1 | 16.0 | 11.2 | 8.54 | 13.9 | 9.16 | 8.93 | 9.79 | 9.93 |
| Nd | 42.1 | 47.1 | 34.6 | 50.0 | 47.7 | 60.3 | 41.0 | 32.6 | 50.8 | 39.2 | 33.5 | 37.0 | 35.5 |
| Sm | 8.05 | 10.4 | 6.15 | 9.31 | 8.02 | 10.9 | 7.86 | 6.04 | 9.45 | 6.84 | 6.71 | 6.75 | 6.85 |
| Eu | 1.62 | 1.46 | 1.16 | 1.52 | 1.42 | 1.92 | 1.27 | 1.15 | 1.84 | 1.02 | 1.18 | 1.24 | 1.37 |
| Gd | 7.25 | 9.18 | 5.52 | 8.24 | 6.62 | 9.92 | 6.80 | 5.36 | 8.34 | 6.79 | 6.18 | 6.16 | 6.38 |
| Tb | 1.23 | 1.67 | 0.933 | 1.42 | 1.04 | 1.57 | 1.10 | 0.925 | 1.39 | 1.077 | 1.03 | 1.04 | 1.09 |
| Dy | 6.03 | 8.97 | 4.88 | 7.21 | 4.85 | 7.10 | 5.32 | 4.77 | 6.83 | 4.75 | 5.33 | 4.99 | 5.90 |
| Ho | 1.27 | 1.96 | 1.01 | 1.53 | 1.04 | 1.49 | 1.15 | 1.04 | 1.44 | 1.151 | 1.16 | 1.06 | 1.28 |
| Er | 3.70 | 5.30 | 3.02 | 4.30 | 3.21 | 4.15 | 3.28 | 2.88 | 4.20 | 3.33 | 3.07 | 3.00 | 3.50 |
| Tm | 0.586 | 0.839 | 0.481 | 0.660 | 0.505 | 0.631 | 0.505 | 0.453 | 0.674 | 0.481 | 0.477 | 0.479 | 0.578 |
| Yb | 3.68 | 4.85 | 2.97 | 4.09 | 3.30 | 3.82 | 3.18 | 2.72 | 4.30 | 3.08 | 2.73 | 2.85 | 3.47 |
| Lu | 0.587 | 0.678 | 0.469 | 0.602 | 0.519 | 0.560 | 0.456 | 0.420 | 0.661 | 0.364 | 0.385 | 0.417 | 0.511 |
| Hf | 5.09 | 8.12 | 4.17 | 4.60 | 4.92 | 6.49 | 8.02 | 6.45 | 4.52 | 6.76 | 6.51 | 7.40 | 5.28 |
| Ta | 1.42 | 0.905 | 1.17 | 1.24 | 1.28 | 0.974 | 0.982 | 0.869 | 1.40 | 0.835 | 0.887 | 0.943 | 1.20 |
| Pb | 80.3 | 39.3 | 61.8 | 52.7 | 64.2 | 16.0 | 20.1 | 21.6 | 209 | 29.1 | 19.1 | 28.3 | 8.76 |
| Th | 22.8 | 18.0 | 19.4 | 22.6 | 21.9 | 18.0 | 23.5 | 16.6 | 28.9 | 17.2 | 17.6 | 19.5 | 18.7 |
| U | 3.39 | 3.17 | 4.83 | 4.00 | 5.30 | 3.48 | 4.12 | 3.59 | 4.40 | 2.44 | 2.93 | 3.02 | 3.97 |
| ∑REE | 249.39 | 260.37 | 199.91 | 279.90 | 264.99 | 283.28 | 221.24 | 183.43 | 286.50 | 203.00 | 193.95 | 212.10 | 218.82 |
| LREE/HREE | 9.25 | 6.79 | 9.37 | 8.98 | 11.57 | 8.69 | 9.16 | 8.88 | 9.29 | 8.66 | 8.52 | 9.60 | 8.63 |
| δEu | 0.63 | 0.45 | 0.60 | 0.52 | 0.58 | 0.55 | 0.52 | 0.60 | 0.62 | 0.45 | 0.55 | 0.58 | 0.62 |
| LaN/YbN | 10.46 | 7.35 | 10.53 | 11.08 | 14.43 | 13.36 | 11.25 | 10.37 | 10.25 | 10.49 | 10.93 | 11.66 | 10.05 |

Note: CIA = Al2O3/(Al2O3+CaO*+Na2O+K2O)×100 and PIA = (Al2O3-K2O)/(Al2O3+CaO*+Na2O-K2O)×100 (in molecular proportions, where CaO* is the amount incorporated in the silicate fraction, Fe2O3 T represents total FeO content in the samples)

Supplementary Table 2 LA-ICP-MS U-Pb isotopic data of standard zircon 91500 (reference 206Pb/238U age = 1062.4±0.8 Ma; Wiedenbeck et al., 1995)

| Spot. | Content（ppm） | | | Isotopic ration | | | | | | | | Ages（Ma） | | | | | | |
| --- | --- | --- | --- | --- | --- | --- | --- | --- | --- | --- | --- | --- | --- | --- | --- | --- | --- | --- |
| Pb | Th | U | 207Pb/  206Pb | 1σ | 207Pb/  235U | 1σ | 206Pb/  238U | 1σ | 208Pb/  232Th | 1σ | 207Pb/  206Pb | 1σ | 207Pb/  235U | 1σ | 206Pb/  238U | 1σ | Concordance |
| 91500 | 16.3 | 28.5 | 78.7 | 0.0736 | 0.0025 | 1.8170 | 0.0634 | 0.1790 | 0.0020 | 0.0540 | 0.0014 | 1031 | 69 | 1052 | 23 | 1061 | 11 | 99% |
| 91500 | 16.4 | 28.6 | 79.5 | 0.0761 | 0.0025 | 1.8834 | 0.0646 | 0.1794 | 0.0020 | 0.0541 | 0.0015 | 1098 | 65 | 1075 | 23 | 1063 | 11 | 98% |
| 91500 | 16.0 | 27.9 | 77.1 | 0.0731 | 0.0023 | 1.8112 | 0.0562 | 0.1793 | 0.0021 | 0.0530 | 0.0014 | 1017 | 64 | 1050 | 20 | 1063 | 12 | 98% |
| 91500 | 16.2 | 27.8 | 77.8 | 0.0767 | 0.0027 | 1.8892 | 0.0631 | 0.1790 | 0.0022 | 0.0551 | 0.0016 | 1122 | 69 | 1077 | 22 | 1062 | 12 | 98% |
| 91500 | 16.8 | 28.2 | 77.6 | 0.0750 | 0.0026 | 1.8513 | 0.0617 | 0.1792 | 0.0024 | 0.0550 | 0.0015 | 1133 | 70 | 1064 | 22 | 1063 | 13 | 99% |
| 91500 | 16.7 | 27.9 | 77.2 | 0.0748 | 0.0025 | 1.8491 | 0.0589 | 0.1791 | 0.0021 | 0.0531 | 0.0014 | 1062 | 67 | 1063 | 21 | 1062 | 12 | 99% |
| 91500 | 15.9 | 28.4 | 77.5 | 0.0760 | 0.0025 | 1.8780 | 0.0640 | 0.1790 | 0.0021 | 0.0538 | 0.0016 | 1094 | 66 | 1073 | 23 | 1062 | 11 | 98% |
| 91500 | 15.3 | 27.0 | 74.6 | 0.0738 | 0.0027 | 1.8224 | 0.0647 | 0.1793 | 0.0021 | 0.0543 | 0.0016 | 1036 | 74 | 1054 | 23 | 1063 | 12 | 99% |
| 91500 | 16.1 | 28.2 | 78.6 | 0.0753 | 0.0024 | 1.8553 | 0.0603 | 0.1790 | 0.0023 | 0.0536 | 0.0016 | 1076 | 65 | 1065 | 21 | 1061 | 13 | 99% |
| 91500 | 16.3 | 28.9 | 79.6 | 0.0745 | 0.0024 | 1.8451 | 0.0622 | 0.1794 | 0.0024 | 0.0545 | 0.0016 | 1054 | 66 | 1062 | 22 | 1064 | 13 | 99% |
| 91500 | 15.9 | 27.6 | 76.0 | 0.0749 | 0.0025 | 1.8481 | 0.0643 | 0.1790 | 0.0020 | 0.0530 | 0.0016 | 1065 | 67 | 1063 | 23 | 1061 | 11 | 99% |
| 91500 | 16.0 | 27.4 | 76.2 | 0.0749 | 0.0025 | 1.8523 | 0.0624 | 0.1794 | 0.0019 | 0.0551 | 0.0015 | 1065 | 67 | 1064 | 22 | 1064 | 11 | 99% |
| 91500 | 15.3 | 26.3 | 73.0 | 0.0749 | 0.0023 | 1.8522 | 0.0580 | 0.1794 | 0.0024 | 0.0534 | 0.0017 | 1066 | 62 | 1064 | 21 | 1064 | 13 | 99% |
| 91500 | 16.4 | 28.2 | 78.1 | 0.0749 | 0.0023 | 1.8482 | 0.0579 | 0.1790 | 0.0021 | 0.0547 | 0.0016 | 1065 | 57 | 1063 | 21 | 1061 | 11 | 99% |
| 91500 | 15.5 | 26.3 | 73.3 | 0.0752 | 0.0025 | 1.8569 | 0.0604 | 0.1789 | 0.0020 | 0.0535 | 0.0017 | 1076 | 67 | 1066 | 21 | 1061 | 11 | 99% |
| 91500 | 15.3 | 26.1 | 72.2 | 0.0745 | 0.0026 | 1.8435 | 0.0627 | 0.1794 | 0.0021 | 0.0545 | 0.0017 | 1057 | 70 | 1061 | 22 | 1064 | 11 | 99% |
| 91500 | 16.4 | 28.7 | 78.8 | 0.0749 | 0.0026 | 1.8479 | 0.0592 | 0.1792 | 0.0022 | 0.0528 | 0.0016 | 1133 | 74 | 1063 | 21 | 1063 | 12 | 99% |
| 91500 | 16.1 | 27.2 | 76.9 | 0.0748 | 0.0025 | 1.8525 | 0.0598 | 0.1791 | 0.0021 | 0.0553 | 0.0016 | 1065 | 67 | 1064 | 21 | 1062 | 11 | 99% |
| 91500 | 16.1 | 27.8 | 76.9 | 0.0736 | 0.0026 | 1.8210 | 0.0626 | 0.1796 | 0.0018 | 0.0539 | 0.0016 | 1031 | 68 | 1053 | 23 | 1065 | 10 | 98% |
| 91500 | 16.0 | 27.5 | 76.3 | 0.0761 | 0.0026 | 1.8794 | 0.0627 | 0.1788 | 0.0019 | 0.0541 | 0.0015 | 1098 | 68 | 1074 | 22 | 1060 | 10 | 98% |
| 91500 | 16.6 | 28.1 | 79.0 | 0.0749 | 0.0025 | 1.8452 | 0.0619 | 0.1789 | 0.0022 | 0.0549 | 0.0017 | 1066 | 67 | 1062 | 22 | 1061 | 12 | 99% |
| 91500 | 16.4 | 28.3 | 78.0 | 0.0748 | 0.0026 | 1.8552 | 0.0658 | 0.1794 | 0.0022 | 0.0532 | 0.0016 | 1065 | 69 | 1065 | 23 | 1064 | 12 | 99% |
| 91500 | 16.3 | 28.0 | 77.6 | 0.0764 | 0.0023 | 1.8902 | 0.0589 | 0.1789 | 0.0019 | 0.0535 | 0.0015 | 1106 | 61 | 1078 | 21 | 1061 | 10 | 98% |
| 91500 | 16.3 | 27.8 | 77.1 | 0.0734 | 0.0023 | 1.8102 | 0.0547 | 0.1795 | 0.0021 | 0.0546 | 0.0015 | 1025 | 63 | 1049 | 20 | 1064 | 12 | 98% |
| 91500 | 16.2 | 27.5 | 76.4 | 0.0750 | 0.0024 | 1.8553 | 0.0571 | 0.1795 | 0.0022 | 0.0534 | 0.0017 | 1133 | 64 | 1065 | 20 | 1064 | 12 | 99% |
| 91500 | 16.1 | 27.0 | 76.1 | 0.0748 | 0.0023 | 1.8451 | 0.0585 | 0.1788 | 0.0022 | 0.0547 | 0.0015 | 1065 | 63 | 1062 | 21 | 1060 | 12 | 99% |
| 91500 | 16.2 | 28.1 | 74.5 | 0.0749 | 0.0028 | 1.8502 | 0.0694 | 0.1792 | 0.0025 | 0.0540 | 0.0018 | 1065 | 75 | 1064 | 25 | 1062 | 14 | 99% |
| 91500 | 16.1 | 27.3 | 73.4 | 0.0745 | 0.0023 | 1.8397 | 0.0572 | 0.1795 | 0.0024 | 0.0545 | 0.0015 | 1054 | 63 | 1060 | 20 | 1064 | 13 | 99% |
| 91500 | 16.4 | 27.4 | 74.9 | 0.0753 | 0.0021 | 1.8607 | 0.0529 | 0.1788 | 0.0020 | 0.0536 | 0.0014 | 1076 | 57 | 1067 | 19 | 1060 | 11 | 99% |
| 91500 | 16.7 | 28.1 | 77.0 | 0.0734 | 0.0022 | 1.8094 | 0.0549 | 0.1789 | 0.0022 | 0.0549 | 0.0017 | 1033 | 59 | 1049 | 20 | 1061 | 12 | 98% |
| 91500 | 16.6 | 28.5 | 75.8 | 0.0764 | 0.0022 | 1.8910 | 0.0556 | 0.1794 | 0.0020 | 0.0532 | 0.0015 | 1106 | 53 | 1078 | 20 | 1064 | 11 | 98% |
| 91500 | 16.7 | 27.6 | 76.5 | 0.0755 | 0.0026 | 1.8641 | 0.0646 | 0.1795 | 0.0023 | 0.0532 | 0.0014 | 1081 | 70 | 1068 | 23 | 1064 | 12 | 99% |
| 91500 | 16.8 | 28.0 | 77.1 | 0.0743 | 0.0023 | 1.8363 | 0.0586 | 0.1789 | 0.0024 | 0.0549 | 0.0016 | 1050 | 68 | 1059 | 21 | 1061 | 13 | 99% |
| 91500 | 16.0 | 27.0 | 75.8 | 0.0765 | 0.0024 | 1.8840 | 0.0572 | 0.1790 | 0.0021 | 0.0537 | 0.0017 | 1109 | 62 | 1075 | 20 | 1062 | 11 | 98% |
| 91500 | 16.2 | 27.6 | 76.6 | 0.0733 | 0.0022 | 1.8164 | 0.0555 | 0.1793 | 0.0021 | 0.0543 | 0.0016 | 1021 | 60 | 1051 | 20 | 1063 | 12 | 98% |
| 91500 | 16.5 | 28.1 | 77.8 | 0.0751 | 0.0022 | 1.8542 | 0.0536 | 0.1789 | 0.0022 | 0.0553 | 0.0016 | 1072 | 59 | 1065 | 19 | 1061 | 12 | 99% |
| 91500 | 16.4 | 28.4 | 77.4 | 0.0746 | 0.0024 | 1.8462 | 0.0589 | 0.1794 | 0.0021 | 0.0528 | 0.0014 | 1058 | 65 | 1062 | 21 | 1064 | 11 | 99% |
| 91500 | 15.5 | 26.4 | 73.0 | 0.0731 | 0.0025 | 1.8026 | 0.0636 | 0.1789 | 0.0022 | 0.0554 | 0.0016 | 1017 | 69 | 1046 | 23 | 1061 | 12 | 98% |
| 91500 | 15.7 | 27.3 | 73.6 | 0.0767 | 0.0023 | 1.8978 | 0.0584 | 0.1794 | 0.0022 | 0.0527 | 0.0015 | 1122 | 61 | 1080 | 20 | 1064 | 12 | 98% |
| 91500 | 15.6 | 26.9 | 73.9 | 0.0749 | 0.0026 | 1.8502 | 0.0663 | 0.1792 | 0.0025 | 0.0540 | 0.0017 | 1065 | 75 | 1064 | 24 | 1062 | 14 | 99% |
| 91500 | 15.5 | 26.4 | 73.3 | 0.0739 | 0.0023 | 1.8262 | 0.0592 | 0.1791 | 0.0022 | 0.0549 | 0.0016 | 1039 | 63 | 1055 | 21 | 1062 | 12 | 99% |
| 91500 | 15.4 | 26.4 | 73.1 | 0.0758 | 0.0022 | 1.8742 | 0.0553 | 0.1792 | 0.0022 | 0.0532 | 0.0014 | 1100 | 58 | 1072 | 20 | 1063 | 12 | 99% |
| 91500 | 15.2 | 26.8 | 74.2 | 0.0764 | 0.0026 | 1.8857 | 0.0623 | 0.1788 | 0.0023 | 0.0550 | 0.0015 | 1106 | 67 | 1076 | 22 | 1060 | 12 | 98% |
| 91500 | 15.3 | 27.1 | 75.0 | 0.0734 | 0.0025 | 1.8147 | 0.0583 | 0.1796 | 0.0023 | 0.0530 | 0.0015 | 1025 | 68 | 1051 | 21 | 1065 | 13 | 98% |
| 91500 | 15.2 | 26.6 | 73.9 | 0.0735 | 0.0023 | 1.8237 | 0.0598 | 0.1792 | 0.0022 | 0.0539 | 0.0016 | 1028 | 68 | 1054 | 22 | 1063 | 12 | 99% |
| 91500 | 15.5 | 27.1 | 74.7 | 0.0762 | 0.0023 | 1.8767 | 0.0544 | 0.1791 | 0.0022 | 0.0541 | 0.0017 | 1102 | 61 | 1073 | 19 | 1062 | 12 | 98% |
| 91500 | 15.2 | 26.5 | 72.2 | 0.0766 | 0.0026 | 1.8862 | 0.0622 | 0.1789 | 0.0023 | 0.0545 | 0.0017 | 1109 | 67 | 1076 | 22 | 1061 | 13 | 98% |
| 91500 | 14.7 | 25.8 | 70.2 | 0.0732 | 0.0022 | 1.8142 | 0.0560 | 0.1794 | 0.0022 | 0.0536 | 0.0017 | 1020 | 56 | 1051 | 20 | 1064 | 12 | 98% |
| 91500 | 15.0 | 26.2 | 70.7 | 0.0773 | 0.0025 | 1.9089 | 0.0582 | 0.1788 | 0.0022 | 0.0540 | 0.0015 | 1131 | 65 | 1084 | 20 | 1060 | 12 | 97% |
| 91500 | 14.0 | 24.6 | 66.2 | 0.0724 | 0.0025 | 1.7915 | 0.0589 | 0.1796 | 0.0025 | 0.0541 | 0.0016 | 998 | 69 | 1042 | 21 | 1065 | 14 | 97% |
| 91500 | 14.7 | 25.0 | 68.2 | 0.0761 | 0.0022 | 1.8830 | 0.0585 | 0.1791 | 0.0021 | 0.0549 | 0.0016 | 1098 | 64 | 1075 | 21 | 1062 | 12 | 98% |
| 91500 | 13.5 | 22.2 | 63.4 | 0.0736 | 0.0023 | 1.8174 | 0.0577 | 0.1793 | 0.0022 | 0.0532 | 0.0018 | 1031 | 64 | 1052 | 21 | 1063 | 12 | 98% |
| 91500 | 14.1 | 24.4 | 66.8 | 0.0764 | 0.0027 | 1.8892 | 0.0672 | 0.1790 | 0.0020 | 0.0534 | 0.0016 | 1106 | 69 | 1077 | 24 | 1062 | 11 | 98% |
| 91500 | 13.9 | 23.7 | 65.9 | 0.0734 | 0.0029 | 1.8112 | 0.0691 | 0.1793 | 0.0021 | 0.0547 | 0.0016 | 1033 | 80 | 1049 | 25 | 1063 | 11 | 98% |
| 91500 | 14.4 | 25.0 | 69.5 | 0.0726 | 0.0025 | 1.7854 | 0.0614 | 0.1788 | 0.0022 | 0.0537 | 0.0014 | 1011 | 72 | 1040 | 22 | 1060 | 12 | 98% |
| 91500 | 15.3 | 26.5 | 72.6 | 0.0772 | 0.0024 | 1.9150 | 0.0604 | 0.1796 | 0.0020 | 0.0544 | 0.0015 | 1128 | 63 | 1086 | 21 | 1065 | 11 | 97% |
| 91500 | 13.7 | 24.4 | 68.4 | 0.0749 | 0.0028 | 1.8562 | 0.0668 | 0.1795 | 0.0021 | 0.0519 | 0.0015 | 1065 | 74 | 1066 | 24 | 1064 | 11 | 99% |
| 91500 | 13.8 | 24.2 | 69.2 | 0.0749 | 0.0027 | 1.8442 | 0.0646 | 0.1788 | 0.0023 | 0.0562 | 0.0016 | 1065 | 73 | 1061 | 23 | 1061 | 12 | 99% |
| 91500 | 13.2 | 22.0 | 65.6 | 0.0752 | 0.0028 | 1.8529 | 0.0696 | 0.1787 | 0.0023 | 0.0543 | 0.0016 | 1076 | 74 | 1064 | 25 | 1060 | 13 | 99% |
| 91500 | 13.6 | 22.9 | 67.0 | 0.0745 | 0.0023 | 1.8475 | 0.0601 | 0.1796 | 0.0022 | 0.0537 | 0.0018 | 1057 | 63 | 1063 | 21 | 1065 | 12 | 99% |
| 91500 | 14.8 | 25.8 | 71.9 | 0.0757 | 0.0024 | 1.8648 | 0.0543 | 0.1791 | 0.0022 | 0.0526 | 0.0016 | 1087 | 58 | 1069 | 19 | 1062 | 12 | 99% |
| 91500 | 15.3 | 26.8 | 74.1 | 0.0741 | 0.0023 | 1.8356 | 0.0559 | 0.1793 | 0.0021 | 0.0555 | 0.0017 | 1043 | 58 | 1058 | 20 | 1063 | 12 | 99% |
| 91500 | 14.4 | 25.2 | 69.7 | 0.0730 | 0.0025 | 1.8115 | 0.0617 | 0.1791 | 0.0021 | 0.0543 | 0.0015 | 1015 | 70 | 1050 | 22 | 1062 | 12 | 98% |
| 91500 | 14.0 | 24.0 | 67.8 | 0.0767 | 0.0028 | 1.8889 | 0.0627 | 0.1793 | 0.0025 | 0.0537 | 0.0017 | 1115 | 71 | 1077 | 22 | 1063 | 14 | 98% |
| 91500 | 13.7 | 23.1 | 67.9 | 0.0743 | 0.0027 | 1.8498 | 0.0686 | 0.1796 | 0.0021 | 0.0530 | 0.0016 | 1051 | 74 | 1063 | 24 | 1065 | 12 | 99% |
| 91500 | 13.5 | 22.7 | 67.1 | 0.0754 | 0.0027 | 1.8506 | 0.0618 | 0.1788 | 0.0022 | 0.0551 | 0.0017 | 1080 | 72 | 1064 | 22 | 1060 | 12 | 99% |
| 91500 | 13.3 | 22.3 | 66.5 | 0.0758 | 0.0024 | 1.8653 | 0.0569 | 0.1788 | 0.0024 | 0.0544 | 0.0017 | 1100 | 60 | 1069 | 20 | 1060 | 13 | 99% |
| 91500 | 13.2 | 22.0 | 65.9 | 0.0739 | 0.0023 | 1.8351 | 0.0562 | 0.1796 | 0.0023 | 0.0537 | 0.0016 | 1039 | 63 | 1058 | 20 | 1065 | 13 | 99% |
| 91500 | 13.5 | 23.0 | 66.7 | 0.0758 | 0.0025 | 1.8622 | 0.0596 | 0.1788 | 0.0023 | 0.0528 | 0.0016 | 1100 | 67 | 1068 | 21 | 1060 | 13 | 99% |
| 91500 | 13.2 | 21.7 | 64.6 | 0.0740 | 0.0022 | 1.8382 | 0.0565 | 0.1796 | 0.0021 | 0.0553 | 0.0015 | 1043 | 56 | 1059 | 20 | 1065 | 12 | 99% |

Supplementary Table 3 LA-ICP-MS U-Pb isotopic data of detrital zircons of clastic sedimentary rocks from Jinggangshan area, Cathaysia Block

| Spot. | | Content（ppm） | | | | Ration | | | Isotopic ration | | | | | | | | | | | | | | | | | | | | | Ages（Ma） | | | | | | | | | | | | | | | | | | |
| --- | --- | --- | --- | --- | --- | --- | --- | --- | --- | --- | --- | --- | --- | --- | --- | --- | --- | --- | --- | --- | --- | --- | --- | --- | --- | --- | --- | --- | --- | --- | --- | --- | --- | --- | --- | --- | --- | --- | --- | --- | --- | --- | --- | --- | --- | --- | --- | --- |
| Th | | U | | Th/U | | | 207Pb/  206Pb | | | 1σ | | | 207Pb/  235U | 1σ | 206Pb/  238U | | | 1σ | | | 208Pb/  232Th | | | 1σ | | | | 207Pb/  206Pb | | | 1σ | | | 207Pb/  235U | | | 1σ | | 206Pb/  238U | | | 1σ | | | | Concordance |
| **Sample P40-01: Early Cambrian sandstone from Cathaysia block (N26°35′49.56″, E114°32′13.71″)** | | | | | | | | | | | | | | | | | | | | | | | | | | | | | | | | | | | | | | | | | | | | | | | | |
| P40-01-01 | | 2.24 | | 280 | | 0.01 | | | 0.0707 | | | 0.0016 | | | 1.5289 | 0.0341 | 0.1559 | | | 0.0014 | | | 0.0451 | | | 0.0040 | | | | 948 | | | 45 | | | 942 | | | 14 | | 934 | | | 8 | | | | 99% |
| P40-01-02 | | 80.4 | | 351 | | 0.23 | | | 0.0709 | | | 0.0013 | | | 1.5550 | 0.0296 | 0.1580 | | | 0.0014 | | | 0.0498 | | | 0.0011 | | | | 955 | | | 39 | | | 952 | | | 12 | | 946 | | | 8 | | | | 99% |
| P40-01-03 | | 341 | | 884 | | 0.39 | | | 0.0609 | | | 0.0011 | | | 0.8976 | 0.0164 | 0.1061 | | | 0.0009 | | | 0.0335 | | | 0.0005 | | | | 639 | | | 39 | | | 650 | | | 9 | | 650 | | | 5 | | | | 99% |
| P40-01-04 | | 124 | | 472 | | 0.26 | | | 0.0742 | | | 0.0013 | | | 1.6125 | 0.0317 | 0.1564 | | | 0.0019 | | | 0.0438 | | | 0.0008 | | | | 1056 | | | 34 | | | 975 | | | 12 | | 937 | | | 11 | | | | 96% |
| P40-01-05 | | 8.30 | | 828 | | 0.01 | | | 0.0761 | | | 0.0013 | | | 1.8593 | 0.0346 | 0.1754 | | | 0.0018 | | | 0.0601 | | | 0.0026 | | | | 1098 | | | 33 | | | 1067 | | | 12 | | 1042 | | | 10 | | | | 97% |
| P40-01-06 | | 483 | | 1782 | | 0.27 | | | 0.0810 | | | 0.0015 | | | 2.3543 | 0.0566 | 0.2079 | | | 0.0032 | | | 0.0634 | | | 0.0012 | | | | 1220 | | | 37 | | | 1229 | | | 17 | | 1218 | | | 17 | | | | 99% |
| P40-01-07 | | 118 | | 132 | | 0.89 | | | 0.0754 | | | 0.0018 | | | 1.8828 | 0.0451 | 0.1798 | | | 0.0018 | | | 0.0540 | | | 0.0010 | | | | 1080 | | | 48 | | | 1075 | | | 16 | | 1066 | | | 10 | | | | 99% |
| P40-01-08 | | 196 | | 305 | | 0.64 | | | 0.0662 | | | 0.0014 | | | 1.1372 | 0.0256 | 0.1236 | | | 0.0011 | | | 0.0379 | | | 0.0006 | | | | 813 | | | 46 | | | 771 | | | 12 | | 751 | | | 6 | | | | 97% |
| P40-01-09 | | 120 | | 158 | | 0.76 | | | 0.1263 | | | 0.0022 | | | 6.3288 | 0.1171 | 0.3614 | | | 0.0035 | | | 0.1023 | | | 0.0016 | | | | 2047 | | | 30 | | | 2022 | | | 16 | | 1989 | | | 17 | | | | 98% |
| P40-01-10 | | 184 | | 507 | | 0.36 | | | 0.0597 | | | 0.0011 | | | 0.8187 | 0.0155 | 0.0990 | | | 0.0008 | | | 0.0316 | | | 0.0006 | | | | 594 | | | 42 | | | 607 | | | 9 | | 609 | | | 5 | | | | 99% |
| P40-01-11 | | 191 | | 379 | | 0.50 | | | 0.0623 | | | 0.0013 | | | 1.2014 | 0.0256 | 0.1392 | | | 0.0013 | | | 0.0434 | | | 0.0008 | | | | 687 | | | 44 | | | 801 | | | 12 | | 840 | | | 7 | | | | 95% |
| P40-01-12 | | 77.4 | | 102 | | 0.76 | | | 0.0739 | | | 0.0024 | | | 1.9729 | 0.0630 | 0.1937 | | | 0.0022 | | | 0.0595 | | | 0.0013 | | | | 1039 | | | 64 | | | 1106 | | | 22 | | 1142 | | | 12 | | | | 96% |
| P40-01-13 | | 406 | | 489 | | 0.83 | | | 0.0706 | | | 0.0014 | | | 1.6564 | 0.0336 | 0.1696 | | | 0.0014 | | | 0.0510 | | | 0.0009 | | | | 946 | | | 41 | | | 992 | | | 13 | | 1010 | | | 8 | | | | 98% |
| P40-01-14 | | 342 | | 385 | | 0.89 | | | 0.1569 | | | 0.0025 | | | 9.8349 | 0.1636 | 0.4530 | | | 0.0034 | | | 0.1248 | | | 0.0019 | | | | 2433 | | | 28 | | | 2419 | | | 15 | | 2409 | | | 15 | | | | 99% |
| P40-01-15 | | 155 | | 159 | | 0.98 | | | 0.0697 | | | 0.0016 | | | 1.5916 | 0.0377 | 0.1653 | | | 0.0015 | | | 0.0496 | | | 0.0008 | | | | 920 | | | 48 | | | 967 | | | 15 | | 986 | | | 8 | | | | 98% |
| P40-01-16 | | 84.9 | | 154 | | 0.55 | | | 0.0986 | | | 0.0019 | | | 3.7360 | 0.0701 | 0.2750 | | | 0.0028 | | | 0.0829 | | | 0.0015 | | | | 1598 | | | 36 | | | 1579 | | | 15 | | 1566 | | | 14 | | | | 99% |
| P40-01-17 | | 145 | | 147 | | 0.99 | | | 0.0610 | | | 0.0019 | | | 0.7644 | 0.0234 | 0.0913 | | | 0.0010 | | | 0.0285 | | | 0.0005 | | | | 639 | | | 69 | | | 577 | | | 13 | | 563 | | | 6 | | | | 97% |
| P40-01-18 | | 63.0 | | 152 | | 0.41 | | | 0.1395 | | | 0.0026 | | | 7.4143 | 0.1442 | 0.3841 | | | 0.0034 | | | 0.1069 | | | 0.0020 | | | | 2221 | | | 33 | | | 2163 | | | 17 | | 2095 | | | 16 | | | | 96% |
|  | Spot. | | Content（ppm） | | | | Ration | | | Isotopic ration | | | | | | | | | | | | | | | | | | | | Apparent ages（Ma） | | | | | | | | | | | | | | | | | | |
|  | Th | | U | | Th/U | | | 207Pb/  206Pb | | | 1σ | | 207Pb/  235U | 1σ | | | 206Pb/  238U | | | 1σ | | | 208Pb/  232Th | | | 1σ | 207Pb/  206Pb | | 1σ | | | 207Pb/  235U | | | 1σ | | | | | 206Pb/  238U | | | 1σ |  | | |
|  | P40-01-19 | | 124 | | 182 | | 0.68 | | | 0.0670 | | | 0.0016 | | 1.2750 | 0.0308 | | | 0.1374 | | | 0.0013 | | | 0.0421 | | | 0.0008 | 839 | | 48 | | | 835 | | | 14 | | | | | 830 | | | 7 | 99% | | |
|  | P40-01-20 | | 84.5 | | 149 | | 0.57 | | | 0.1086 | | | 0.0020 | | 4.3765 | 0.0840 | | | 0.2913 | | | 0.0025 | | | 0.0839 | | | 0.0014 | 1776 | | 33 | | | 1708 | | | 16 | | | | | 1648 | | | 12 | 96% | | |
|  | P40-01-21 | | 209 | | 267 | | 0.78 | | | 0.0665 | | | 0.0020 | | 0.8212 | 0.0280 | | | 0.0887 | | | 0.0009 | | | 0.0301 | | | 0.0007 | 833 | | 59 | | | 609 | | | 16 | | | | | 548 | | | 5 | 89% | | |
|  | P40-01-22 | | 348 | | 511 | | 0.68 | | | 0.0666 | | | 0.0013 | | 1.1593 | 0.0232 | | | 0.1258 | | | 0.0011 | | | 0.0381 | | | 0.0006 | 828 | | 39 | | | 782 | | | 11 | | | | | 764 | | | 6 | 97% | | |
|  | P40-01-23 | | 131 | | 712 | | 0.18 | | | 0.0757 | | | 0.0015 | | 1.6554 | 0.0444 | | | 0.1566 | | | 0.0019 | | | 0.0616 | | | 0.0028 | 1089 | | 39 | | | 992 | | | 17 | | | | | 938 | | | 11 | 94% | | |
|  | P40-01-24 | | 15.7 | | 90.5 | | 0.17 | | | 0.0674 | | | 0.0022 | | 1.1957 | 0.0393 | | | 0.1291 | | | 0.0015 | | | 0.0389 | | | 0.0014 | 850 | | 64 | | | 799 | | | 18 | | | | | 783 | | | 8 | 98% | | |
|  | P40-01-25 | | 102 | | 676 | | 0.15 | | | 0.0717 | | | 0.0014 | | 1.6103 | 0.0332 | | | 0.1625 | | | 0.0014 | | | 0.0470 | | | 0.0010 | 977 | | 39 | | | 974 | | | 13 | | | | | 971 | | | 8 | 99% | | |
|  | P40-01-26 | | 121 | | 410 | | 0.29 | | | 0.0723 | | | 0.0018 | | 0.8642 | 0.0233 | | | 0.0860 | | | 0.0008 | | | 0.0366 | | | 0.0010 | 996 | | 55 | | | 632 | | | 13 | | | | | 532 | | | 5 | 82% | | |
|  | P40-01-27 | | 87.7 | | 75.3 | | 1.16 | | | 0.0884 | | | 0.0021 | | 2.9645 | 0.0685 | | | 0.2440 | | | 0.0025 | | | 0.0691 | | | 0.0012 | 1392 | | 47 | | | 1399 | | | 18 | | | | | 1407 | | | 13 | 99% | | |
|  | P40-01-28 | | 136 | | 203 | | 0.67 | | | 0.0704 | | | 0.0015 | | 1.4871 | 0.0348 | | | 0.1529 | | | 0.0016 | | | 0.0468 | | | 0.0009 | 939 | | 44 | | | 925 | | | 14 | | | | | 917 | | | 9 | 99% | | |
|  | P40-01-29 | | 209 | | 77.5 | | 2.69 | | | 0.0655 | | | 0.0023 | | 1.1134 | 0.0384 | | | 0.1238 | | | 0.0014 | | | 0.0371 | | | 0.0007 | 791 | | 73 | | | 760 | | | 18 | | | | | 753 | | | 8 | 99% | | |
|  | P40-01-30 | | 93 | | 74.3 | | 1.25 | | | 0.0686 | | | 0.0024 | | 1.1921 | 0.0414 | | | 0.1268 | | | 0.0016 | | | 0.0380 | | | 0.0009 | 887 | | 79 | | | 797 | | | 19 | | | | | 769 | | | 9 | 96% | | |
|  | P40-01-31 | | 90.8 | | 202 | | 0.45 | | | 0.0725 | | | 0.0016 | | 1.6626 | 0.0381 | | | 0.1658 | | | 0.0016 | | | 0.0505 | | | 0.0010 | 1011 | | 51 | | | 994 | | | 15 | | | | | 989 | | | 9 | 99% | | |
|  | P40-01-32 | | 31.7 | | 74.7 | | 0.42 | | | 0.1682 | | | 0.0030 | | 10.7776 | 0.2020 | | | 0.4632 | | | 0.0045 | | | 0.1319 | | | 0.0026 | 2540 | | 30 | | | 2504 | | | 18 | | | | | 2454 | | | 20 | 97% | | |
|  | P40-01-33 | | 47.9 | | 85.7 | | 0.56 | | | 0.1709 | | | 0.0027 | | 11.7985 | 0.2126 | | | 0.4986 | | | 0.0052 | | | 0.1433 | | | 0.0028 | 2566 | | 27 | | | 2589 | | | 17 | | | | | 2608 | | | 22 | 99% | | |
|  | P40-01-34 | | 97 | | 112 | | 0.87 | | | 0.1573 | | | 0.0028 | | 9.2153 | 0.1619 | | | 0.4233 | | | 0.0034 | | | 0.1157 | | | 0.0018 | 2428 | | 30 | | | 2360 | | | 16 | | | | | 2275 | | | 15 | 96% | | |
|  | P40-01-35 | | 56.6 | | 85.7 | | 0.66 | | | 0.1074 | | | 0.0021 | | 4.6754 | 0.0960 | | | 0.3144 | | | 0.0032 | | | 0.0928 | | | 0.0019 | 1755 | | 35 | | | 1763 | | | 17 | | | | | 1762 | | | 16 | 99% | | |
|  | P40-01-36 | | 31.1 | | 26.4 | | 1.18 | | | 0.0758 | | | 0.0037 | | 1.5693 | 0.0729 | | | 0.1529 | | | 0.0025 | | | 0.0468 | | | 0.0013 | 1100 | | 98 | | | 958 | | | 29 | | | | | 917 | | | 14 | 95% | | |
|  | P40-01-37 | | 141 | | 561 | | 0.25 | | | 0.0715 | | | 0.0014 | | 1.5220 | 0.0312 | | | 0.1533 | | | 0.0013 | | | 0.0464 | | | 0.0009 | 972 | | 41 | | | 939 | | | 13 | | | | | 920 | | | 7 | 97% | | |
|  | P40-01-38 | | 70.6 | | 82.1 | | 0.86 | | | 0.0769 | | | 0.0021 | | 1.8154 | 0.0449 | | | 0.1716 | | | 0.0018 | | | 0.0516 | | | 0.0010 | 1120 | | 54 | | | 1051 | | | 16 | | | | | 1021 | | | 10 | 97% | | |
|  | P40-01-39 | | 89.3 | | 83.1 | | 1.07 | | | 0.1598 | | | 0.0028 | | 9.5001 | 0.1669 | | | 0.4295 | | | 0.0041 | | | 0.1189 | | | 0.0020 | 2453 | | 25 | | | 2388 | | | 16 | | | | | 2303 | | | 18 | 96% | | |
|  | Spot. | | Content（ppm） | | | | Ration | | | Isotopic ration | | | | | | | | | | | | | | | | | | | | Apparent ages（Ma） | | | | | | | | | | | | | | | | | | |
|  | Th | | U | | Th/U | | | 207Pb/  206Pb | | | 1σ | | 207Pb/  235U | 1σ | | | 206Pb/  238U | | | 1σ | | | 208Pb/  232Th | | | 1σ | 207Pb/  206Pb | | 1σ | | | 207Pb/  235U | | | 1σ | | | | | 206Pb/  238U | | | 1σ | Concordance | | |
|  | P40-01-41 | | 107 | | 514 | | 0.21 | | | 0.0727 | | | 0.0013 | | 1.7045 | 0.0309 | | | 0.1688 | | | 0.0014 | | | 0.0512 | | | 0.0010 | 1006 | | 37 | | | 1010 | | | 12 | | | | | 1005 | | | 8 | 99% | | |
|  | P40-01-42 | | 256 | | 243 | | 1.05 | | | 0.0711 | | | 0.0016 | | 1.5275 | 0.0347 | | | 0.1548 | | | 0.0015 | | | 0.0477 | | | 0.0008 | 959 | | 42 | | | 942 | | | 14 | | | | | 928 | | | 8 | 98% | | |
|  | P40-01-43 | | 101 | | 77.1 | | 1.32 | | | 0.0724 | | | 0.0021 | | 1.5540 | 0.0464 | | | 0.1545 | | | 0.0018 | | | 0.0480 | | | 0.0009 | 998 | | 59 | | | 952 | | | 18 | | | | | 926 | | | 10 | 97% | | |
|  | P40-01-43 | | 101 | | 77.1 | | 1.32 | | | 0.0724 | | | 0.0021 | | 1.5540 | 0.0464 | | | 0.1545 | | | 0.0018 | | | 0.0480 | | | 0.0009 | 998 | | 59 | | | 952 | | | 18 | | | | | 926 | | | 10 | 97% | | |
|  | P40-01-44 | | 194 | | 122 | | 1.60 | | | 0.1635 | | | 0.0028 | | 10.1134 | 0.1753 | | | 0.4450 | | | 0.0037 | | | 0.1232 | | | 0.0019 | 2492 | | 28 | | | 2445 | | | 16 | | | | | 2373 | | | 17 | 97% | | |
|  | P40-01-45 | | 68.6 | | 220 | | 0.31 | | | 0.2396 | | | 0.0036 | | 20.1578 | 0.3093 | | | 0.6055 | | | 0.0049 | | | 0.1668 | | | 0.0027 | 3118 | | 25 | | | 3099 | | | 15 | | | | | 3052 | | | 20 | 98% | | |
|  | P40-01-46 | | 180 | | 239 | | 0.75 | | | 0.0737 | | | 0.0016 | | 1.6512 | 0.0361 | | | 0.1613 | | | 0.0012 | | | 0.0529 | | | 0.0009 | 1035 | | 44 | | | 990 | | | 14 | | | | | 964 | | | 7 | 97% | | |
|  | P40-01-47 | | 75.4 | | 107 | | 0.71 | | | 0.0698 | | | 0.0022 | | 1.4624 | 0.0443 | | | 0.1516 | | | 0.0014 | | | 0.0468 | | | 0.0010 | 924 | | 63 | | | 915 | | | 18 | | | | | 910 | | | 8 | 99% | | |
|  | P40-01-48 | | 242 | | 284 | | 0.85 | | | 0.0630 | | | 0.0016 | | 1.0562 | 0.0274 | | | 0.1211 | | | 0.0011 | | | 0.0383 | | | 0.0007 | 709 | | 55 | | | 732 | | | 14 | | | | | 737 | | | 6 | 99% | | |
|  | P40-01-49 | | 208 | | 191 | | 1.09 | | | 0.0717 | | | 0.0018 | | 1.4767 | 0.0362 | | | 0.1490 | | | 0.0014 | | | 0.0458 | | | 0.0009 | 977 | | 51 | | | 921 | | | 15 | | | | | 896 | | | 8 | 97% | | |
|  | P40-01-50 | | 222 | | 381 | | 0.58 | | | 0.0711 | | | 0.0013 | | 1.5972 | 0.0318 | | | 0.1620 | | | 0.0013 | | | 0.0498 | | | 0.0008 | 961 | | 39 | | | 969 | | | 12 | | | | | 968 | | | 7 | 99% | | |
|  | P40-01-51 | | 144 | | 301 | | 0.48 | | | 0.0711 | | | 0.0013 | | 1.5181 | 0.0300 | | | 0.1541 | | | 0.0013 | | | 0.0480 | | | 0.0009 | 961 | | 39 | | | 938 | | | 12 | | | | | 924 | | | 7 | 98% | | |
|  | P40-01-52 | | 141 | | 125 | | 1.12 | | | 0.0748 | | | 0.0017 | | 1.7882 | 0.0427 | | | 0.1726 | | | 0.0016 | | | 0.0529 | | | 0.0010 | 1065 | | 46 | | | 1041 | | | 16 | | | | | 1026 | | | 9 | 98% | | |
|  | P40-01-53 | | 127 | | 204 | | 0.62 | | | 0.0707 | | | 0.0016 | | 1.4935 | 0.0339 | | | 0.1530 | | | 0.0014 | | | 0.0462 | | | 0.0008 | 950 | | 46 | | | 928 | | | 14 | | | | | 918 | | | 8 | 98% | | |
|  | P40-01-54 | | 40.5 | | 47.6 | | 0.85 | | | 0.0978 | | | 0.0028 | | 3.5553 | 0.1030 | | | 0.2634 | | | 0.0030 | | | 0.0799 | | | 0.0018 | 1583 | | 54 | | | 1540 | | | 23 | | | | | 1507 | | | 15 | 97% | | |
|  | P40-01-55 | | 411 | | 744 | | 0.55 | | | 0.1608 | | | 0.0030 | | 8.7115 | 0.1663 | | | 0.3914 | | | 0.0032 | | | 0.0983 | | | 0.0017 | 2465 | | 31 | | | 2308 | | | 17 | | | | | 2129 | | | 15 | 91% | | |
|  | P40-01-56 | | 144 | | 523 | | 0.28 | | | 0.0718 | | | 0.0014 | | 1.5685 | 0.0309 | | | 0.1579 | | | 0.0012 | | | 0.0470 | | | 0.0009 | 989 | | 38 | | | 958 | | | 12 | | | | | 945 | | | 7 | 98% | | |
|  | P40-01-57 | | 266 | | 441 | | 0.60 | | | 0.1610 | | | 0.0026 | | 9.4810 | 0.1586 | | | 0.4256 | | | 0.0033 | | | 0.1198 | | | 0.0019 | 2466 | | 28 | | | 2386 | | | 15 | | | | | 2286 | | | 15 | 95% | | |
|  | P40-01-58 | | 97 | | 264 | | 0.37 | | | 0.0617 | | | 0.0015 | | 0.8334 | 0.0208 | | | 0.0978 | | | 0.0009 | | | 0.0310 | | | 0.0007 | 665 | | 54 | | | 615 | | | 12 | | | | | 602 | | | 5 | 97% | | |
|  | P40-01-59 | | 152 | | 141 | | 1.08 | | | 0.0885 | | | 0.0017 | | 2.7650 | 0.0594 | | | 0.2256 | | | 0.0021 | | | 0.0675 | | | 0.0010 | 1394 | | 38 | | | 1346 | | | 16 | | | | | 1311 | | | 11 | 97% | | |
|  | P40-01-60 | | 113 | | 577 | | 0.20 | | | 0.0705 | | | 0.0012 | | 1.5239 | 0.0268 | | | 0.1561 | | | 0.0012 | | | 0.0474 | | | 0.0008 | 943 | | 33 | | | 940 | | | 11 | | | | | 935 | | | 7 | 99% | | |
|  | Spot. | | Content（ppm） | | | | Ration | | | Isotopic ration | | | | | | | | | | | | | | | | | | | | Apparent ages（Ma） | | | | | | | | | | | | | | | | | | |
|  | Th | | U | | Th/U | | | 207Pb/  206Pb | | | 1σ | | 207Pb/  235U | 1σ | | | 206Pb/  238U | | | 1σ | | | 208Pb/  232Th | | | 1σ | 207Pb/  206Pb | | 1σ | | | 207Pb/  235U | | | 1σ | | | | | 206Pb/  238U | | | 1σ | Concordance | | |
|  | P40-01-61 | | 232 | | 476 | | 0.49 | | | 0.0841 | | | 0.0014 | | 2.8657 | 0.0528 | | | 0.2458 | | | 0.0022 | | | 0.0689 | | | 0.0012 | 1294 | | 33 | | | 1373 | | | 14 | | | | | 1417 | | | 11 | 96% | | |
|  | P40-01-62 | | 65 | | 96 | | 0.68 | | | 0.1590 | | | 0.0030 | | 10.4024 | 0.2045 | | | 0.4720 | | | 0.0043 | | | 0.1284 | | | 0.0024 | 2456 | | 31 | | | 2471 | | | 18 | | | | | 2492 | | | 19 | 99% | | |
|  | P40-01-63 | | 235 | | 519 | | 0.45 | | | 0.0704 | | | 0.0013 | | 1.6007 | 0.0310 | | | 0.1642 | | | 0.0015 | | | 0.0486 | | | 0.0009 | 939 | | 45 | | | 971 | | | 12 | | | | | 980 | | | 8 | 98% | | |
|  | P40-01-64 | | 200 | | 715 | | 0.28 | | | 0.0709 | | | 0.0014 | | 1.6829 | 0.0351 | | | 0.1712 | | | 0.0016 | | | 0.0513 | | | 0.0010 | 967 | | 38 | | | 1002 | | | 13 | | | | | 1019 | | | 9 | 98% | | |
|  | P40-01-65 | | 155 | | 183 | | 0.84 | | | 0.0706 | | | 0.0019 | | 1.5357 | 0.0419 | | | 0.1571 | | | 0.0016 | | | 0.0484 | | | 0.0010 | 946 | | 56 | | | 945 | | | 17 | | | | | 941 | | | 9 | 99% | | |
|  | P40-01-66 | | 224 | | 322 | | 0.70 | | | 0.0743 | | | 0.0019 | | 1.8970 | 0.0482 | | | 0.1844 | | | 0.0020 | | | 0.0560 | | | 0.0012 | 1050 | | 50 | | | 1080 | | | 17 | | | | | 1091 | | | 11 | 98% | | |
|  | P40-01-67 | | 193 | | 288 | | 0.67 | | | 0.0947 | | | 0.0024 | | 2.9289 | 0.0783 | | | 0.2228 | | | 0.0025 | | | 0.0706 | | | 0.0016 | 1524 | | 48 | | | 1389 | | | 20 | | | | | 1297 | | | 13 | 93% | | |
|  | P40-01-68 | | 165 | | 887 | | 0.19 | | | 0.0715 | | | 0.0015 | | 1.5583 | 0.0329 | | | 0.1571 | | | 0.0015 | | | 0.0489 | | | 0.0010 | 972 | | 41 | | | 954 | | | 13 | | | | | 941 | | | 8 | 98% | | |
|  | P40-01-69 | | 50 | | 46 | | 1.08 | | | 0.0928 | | | 0.0030 | | 3.1689 | 0.1028 | | | 0.2476 | | | 0.0029 | | | 0.0745 | | | 0.0016 | 1484 | | 55 | | | 1450 | | | 25 | | | | | 1426 | | | 15 | 98% | | |
|  | P40-01-70 | | 132 | | 53 | | 2.48 | | | 0.0797 | | | 0.0026 | | 2.0836 | 0.0703 | | | 0.1892 | | | 0.0024 | | | 0.0584 | | | 0.0010 | 1191 | | 65 | | | 1143 | | | 23 | | | | | 1117 | | | 13 | 97% | | |
|  | P40-01-71 | | 148 | | 195 | | 0.76 | | | 0.0726 | | | 0.0016 | | 1.6128 | 0.0359 | | | 0.1604 | | | 0.0014 | | | 0.0500 | | | 0.0009 | 1011 | | 44 | | | 975 | | | 14 | | | | | 959 | | | 8 | 98% | | |
|  | P40-01-72 | | 100 | | 175 | | 0.57 | | | 0.0932 | | | 0.0018 | | 3.0984 | 0.0633 | | | 0.2400 | | | 0.0024 | | | 0.0726 | | | 0.0014 | 1494 | | 37 | | | 1432 | | | 16 | | | | | 1387 | | | 12 | 96% | | |
|  | P40-01-73 | | 171 | | 352 | | 0.49 | | | 0.0595 | | | 0.0014 | | 0.7110 | 0.0171 | | | 0.0864 | | | 0.0009 | | | 0.0270 | | | 0.0005 | 587 | | 18 | | | 545 | | | 10 | | | | | 534 | | | 5 | 97% | | |
|  | P40-01-74 | | 299 | | 488 | | 0.61 | | | 0.0665 | | | 0.0012 | | 1.1917 | 0.0235 | | | 0.1293 | | | 0.0011 | | | 0.0399 | | | 0.0006 | 820 | | 37 | | | 797 | | | 11 | | | | | 784 | | | 6 | 98% | | |
|  | P40-01-75 | | 115 | | 77 | | 1.49 | | | 0.1608 | | | 0.0025 | | 10.1685 | 0.1658 | | | 0.4574 | | | 0.0040 | | | 0.1286 | | | 0.0020 | 2465 | | 26 | | | 2450 | | | 15 | | | | | 2428 | | | 18 | 99% | | |
|  | P40-01-76 | | 113 | | 172 | | 0.66 | | | 0.0746 | | | 0.0015 | | 1.6603 | 0.0363 | | | 0.1609 | | | 0.0016 | | | 0.0492 | | | 0.0009 | 1057 | | 41 | | | 994 | | | 14 | | | | | 962 | | | 9 | 96% | | |
|  | P40-01-77 | | 44 | | 735 | | 0.06 | | | 0.0753 | | | 0.0012 | | 1.6533 | 0.0320 | | | 0.1582 | | | 0.0014 | | | 0.0676 | | | 0.0020 | 1077 | | 33 | | | 991 | | | 12 | | | | | 947 | | | 8 | 95% | | |
|  | P40-01-78 | | 192 | | 447 | | 0.43 | | | 0.0653 | | | 0.0013 | | 1.1082 | 0.0227 | | | 0.1228 | | | 0.0011 | | | 0.0394 | | | 0.0008 | 783 | | 45 | | | 757 | | | 11 | | | | | 747 | | | 6 | 98% | | |
|  | P40-01-79 | | 71 | | 153 | | 0.47 | | | 0.1068 | | | 0.0020 | | 4.1859 | 0.0808 | | | 0.2837 | | | 0.0024 | | | 0.0833 | | | 0.0015 | 1746 | | 35 | | | 1671 | | | 16 | | | | | 1610 | | | 12 | 96% | | |
|  | P40-01-80 | | 62 | | 117 | | 0.53 | | | 0.1059 | | | 0.0019 | | 4.3028 | 0.0778 | | | 0.2943 | | | 0.0028 | | | 0.0856 | | | 0.0015 | 1731 | | 33 | | | 1694 | | | 15 | | | | | 1663 | | | 14 | 98% | | |
|  | P40-01-81 | | 140 | | 62.1 | | 2.26 | | | 0.0585 | | | 0.0030 | | 0.6854 | 0.0336 | | | 0.0861 | | | 0.0013 | | | 0.0266 | | | 0.0005 | 550 | | 111 | | | 530 | | | 20 | | | | | 532 | | | 8 | 99% | | |
|  | Spot. | | Content（ppm） | | | | | Ration | | | Isotopic ration | | | | | | | | | | | | | | | | | | | Apparent ages（Ma） | | | | | | | | | | | | | | | | | | |
|  | Th | | U | | | Th/U | | | 207Pb/  206Pb | | | 1σ | 207Pb/  235U | 1σ | | 206Pb/  238U | | | 1σ | | | 208Pb/  232Th | | | 1σ | | | 207Pb/  206Pb | | 1σ | | | 207Pb/  235U | | | 1σ | | 206Pb/  238U | | | 1σ | | | | Concordance | |
|  | P40-01-82 | | 120 | | 150 | | | 0.80 | | | 0.0652 | | | 0.0017 | 1.1052 | 0.0290 | | 0.1228 | | | 0.0012 | | | 0.0383 | | | 0.0007 | | | 781 | | 56 | | | 756 | | | 14 | | 747 | | | 7 | | | | 98% | |
|  | P40-01-83 | | 83 | | 386 | | | 0.22 | | | 0.0705 | | | 0.0013 | 1.4099 | 0.0271 | | 0.1445 | | | 0.0012 | | | 0.0438 | | | 0.0008 | | | 943 | | 42 | | | 893 | | | 11 | | 870 | | | 7 | | | | 97% | |
|  | P40-01-84 | | 390 | | 547 | | | 0.71 | | | 0.1699 | | | 0.0029 | 10.6760 | 0.1947 | | 0.4538 | | | 0.0044 | | | 0.1271 | | | 0.0022 | | | 2557 | | 29 | | | 2495 | | | 17 | | 2412 | | | 20 | | | | 96% | |
|  | P40-01-85 | | 173 | | 464 | | | 0.37 | | | 0.0733 | | | 0.0014 | 1.5443 | 0.0319 | | 0.1520 | | | 0.0013 | | | 0.0459 | | | 0.0008 | | | 1022 | | 39 | | | 948 | | | 13 | | 912 | | | 8 | | | | 96% | |
|  | P40-01-86 | | 212 | | 254 | | | 0.83 | | | 0.1646 | | | 0.0026 | 10.1606 | 0.1785 | | 0.4455 | | | 0.0043 | | | 0.1254 | | | 0.0021 | | | 2506 | | 27 | | | 2450 | | | 16 | | 2375 | | | 19 | | | | 96% | |
|  | **Sample P43-01: Late Sinian sandstone from Cathaysia block (N26°37′5.36″, E114°32′19.26″)** | | | | | | | | | | | | | | | | | | | | | | | | | | | | | | | | | | | | | | | | | | | | | | | |
|  | P43-01-01 | | 76 | | 129 | | | 0.59 | | | 0.2018 | | | 0.0032 | 14.0762 | 0.2305 | | 0.5042 | | | 0.0043 | | | 0.1393 | | | 0.0022 | | | 2843 | | 31 | | | 2755 | | | 16 | | 2632 | | | 18 | | | | 95% | |
|  | P43-01-02 | | 94 | | 148 | | | 0.63 | | | 0.0649 | | | 0.0017 | 1.1220 | 0.0300 | | 0.1249 | | | 0.0012 | | | 0.0374 | | | 0.0007 | | | 772 | | 58 | | | 764 | | | 14 | | 759 | | | 7 | | | | 99% | |
|  | P43-01-03 | | 254 | | 406 | | | 0.62 | | | 0.0723 | | | 0.0013 | 1.5653 | 0.0299 | | 0.1563 | | | 0.0014 | | | 0.0469 | | | 0.0008 | | | 994 | | 32 | | | 957 | | | 12 | | 936 | | | 8 | | | | 97% | |
|  | P43-01-04 | | 316 | | 441 | | | 0.72 | | | 0.0713 | | | 0.0014 | 1.4213 | 0.0299 | | 0.1438 | | | 0.0015 | | | 0.0410 | | | 0.0008 | | | 966 | | 39 | | | 898 | | | 13 | | 866 | | | 8 | | | | 96% | |
|  | P43-01-05 | | 82 | | 194 | | | 0.42 | | | 0.0729 | | | 0.0018 | 1.6721 | 0.0435 | | 0.1655 | | | 0.0018 | | | 0.0506 | | | 0.0012 | | | 1013 | | 50 | | | 998 | | | 17 | | 987 | | | 10 | | | | 98% | |
|  | P43-01-06 | | 303 | | 179 | | | 1.69 | | | 0.0692 | | | 0.0015 | 1.5444 | 0.0335 | | 0.1614 | | | 0.0014 | | | 0.0494 | | | 0.0008 | | | 906 | | 44 | | | 948 | | | 13 | | 965 | | | 8 | | | | 98% | |
|  | P43-01-07 | | 105 | | 160 | | | 0.66 | | | 0.3150 | | | 0.0044 | 30.5196 | 0.4526 | | 0.7001 | | | 0.0059 | | | 0.1765 | | | 0.0031 | | | 3545 | | 22 | | | 3504 | | | 15 | | 3421 | | | 22 | | | | 97% | |
|  | P43-01-08 | | 26.5 | | 80 | | | 0.33 | | | 0.0714 | | | 0.0021 | 1.6427 | 0.0488 | | 0.1668 | | | 0.0018 | | | 0.0508 | | | 0.0015 | | | 969 | | 59 | | | 987 | | | 19 | | 994 | | | 10 | | | | 99% | |
|  | P43-01-09 | | 143 | | 242 | | | 0.59 | | | 0.1576 | | | 0.0024 | 9.9811 | 0.1603 | | 0.4572 | | | 0.0037 | | | 0.1265 | | | 0.0020 | | | 2431 | | 25 | | | 2433 | | | 15 | | 2427 | | | 16 | | | | 99% | |
|  | P43-01-10 | | 765 | | 446 | | | 1.71 | | | 0.0982 | | | 0.0017 | 3.7833 | 0.0680 | | 0.2784 | | | 0.0025 | | | 0.0876 | | | 0.0014 | | | 1591 | | 28 | | | 1589 | | | 14 | | 1583 | | | 13 | | | | 99% | |
|  | P43-01-11 | | 126 | | 236 | | | 0.54 | | | 0.0792 | | | 0.0016 | 2.2416 | 0.0469 | | 0.2046 | | | 0.0022 | | | 0.0619 | | | 0.0012 | | | 1189 | | 39 | | | 1194 | | | 15 | | 1200 | | | 12 | | | | 99% | |
|  | P43-01-12 | | 455 | | 742 | | | 0.61 | | | 0.0701 | | | 0.0012 | 1.5141 | 0.0256 | | 0.1561 | | | 0.0013 | | | 0.0474 | | | 0.0007 | | | 931 | | 33 | | | 936 | | | 10 | | 935 | | | 7 | | | | 99% | |
|  | P43-01-13 | | 60 | | 131 | | | 0.46 | | | 0.0630 | | | 0.0018 | 1.0245 | 0.0340 | | 0.1174 | | | 0.0019 | | | 0.0373 | | | 0.0009 | | | 709 | | 57 | | | 716 | | | 17 | | 716 | | | 11 | | | | 99% | |
|  | P43-01-14 | | 126 | | 141 | | | 0.89 | | | 0.0663 | | | 0.0017 | 1.2397 | 0.0320 | | 0.1353 | | | 0.0012 | | | 0.0416 | | | 0.0008 | | | 817 | | 58 | | | 819 | | | 15 | | 818 | | | 7 | | | | 99% | |
|  | P43-01-15 | | 287 | | 293 | | | 0.98 | | | 0.0654 | | | 0.0013 | 1.2370 | 0.0257 | | 0.1368 | | | 0.0011 | | | 0.0395 | | | 0.0007 | | | 787 | | 43 | | | 818 | | | 12 | | 827 | | | 6 | | | | 98% | |
|  | Spot. | | Content（ppm） | | | | | Ration | | | Isotopic ration | | | | | | | | | | | | | | | | | | | Apparent ages（Ma） | | | | | | | | | | | | | | | | | | |
|  | Th | | U | | | Th/U | | | 207Pb/  206Pb | | | 1σ | 207Pb/  235U | 1σ | | 206Pb/  238U | | | 1σ | | | 208Pb/  232Th | | | 1σ | | | 207Pb/  206Pb | | 1σ | | | 207Pb/  235U | | | 1σ | | 206Pb/  238U | | | 1σ | | | | Concordance | |
|  | P43-01-16 | | 82 | | 103 | | | 0.80 | | | 0.1825 | | | 0.0034 | 12.6861 | 0.2487 | | 0.5027 | | | 0.0051 | | | 0.1393 | | | 0.0028 | | | 2676 | | 25 | | | 2657 | | | 19 | | 2625 | | | 22 | | | | 98% | |
|  | P43-01-17 | | 16.8 | | 278 | | | 0.06 | | | 0.0760 | | | 0.0016 | 1.7753 | 0.0389 | | 0.1691 | | | 0.0017 | | | 0.0542 | | | 0.0016 | | | 1094 | | 47 | | | 1036 | | | 14 | | 1007 | | | 9 | | | | 97% | |
|  | P43-01-18 | | 34 | | 55 | | | 0.62 | | | 0.2569 | | | 0.0039 | 19.2317 | 0.3284 | | 0.5412 | | | 0.0054 | | | 0.1475 | | | 0.0028 | | | 3227 | | 24 | | | 3054 | | | 17 | | 2788 | | | 23 | | | | 90% | |
|  | P43-01-19 | | 119 | | 408 | | | 0.29 | | | 0.1509 | | | 0.0024 | 7.3929 | 0.1222 | | 0.3541 | | | 0.0028 | | | 0.1047 | | | 0.0017 | | | 2367 | | 27 | | | 2160 | | | 15 | | 1954 | | | 13 | | | | 89% | |
|  | P43-01-20 | | 32 | | 62 | | | 0.51 | | | 0.0687 | | | 0.0024 | 1.2203 | 0.0428 | | 0.1295 | | | 0.0018 | | | 0.0419 | | | 0.0012 | | | 900 | | 72 | | | 810 | | | 20 | | 785 | | | 10 | | | | 96% | |
|  | P43-01-21 | | 78 | | 125 | | | 0.63 | | | 0.1607 | | | 0.0031 | 9.6640 | 0.2014 | | 0.4344 | | | 0.0044 | | | 0.1210 | | | 0.0024 | | | 2465 | | 32 | | | 2403 | | | 19 | | 2325 | | | 20 | | | | 96% | |
|  | P43-01-22 | | 49 | | 91 | | | 0.54 | | | 0.0885 | | | 0.0023 | 2.9638 | 0.0801 | | 0.2422 | | | 0.0028 | | | 0.0730 | | | 0.0018 | | | 1394 | | 50 | | | 1398 | | | 21 | | 1398 | | | 14 | | | | 99% | |
|  | P43-01-23 | | 117 | | 113 | | | 1.04 | | | 0.0901 | | | 0.0024 | 3.0472 | 0.0864 | | 0.2449 | | | 0.0031 | | | 0.0722 | | | 0.0017 | | | 1429 | | 52 | | | 1420 | | | 22 | | 1412 | | | 16 | | | | 99% | |
|  | P43-01-24 | | 218 | | 196 | | | 1.11 | | | 0.1595 | | | 0.0031 | 10.0489 | 0.2053 | | 0.4555 | | | 0.0045 | | | 0.1253 | | | 0.0023 | | | 2450 | | 33 | | | 2439 | | | 19 | | 2420 | | | 20 | | | | 99% | |
|  | P43-01-25 | | 100 | | 96 | | | 1.04 | | | 0.0638 | | | 0.0021 | 1.0890 | 0.0349 | | 0.1240 | | | 0.0014 | | | 0.0374 | | | 0.0008 | | | 744 | | 268 | | | 748 | | | 17 | | 753 | | | 8 | | | | 99% | |
|  | P43-01-26 | | 29.3 | | 88 | | | 0.33 | | | 0.0717 | | | 0.0022 | 1.5873 | 0.0529 | | 0.1599 | | | 0.0021 | | | 0.0503 | | | 0.0016 | | | 989 | | 62 | | | 965 | | | 21 | | 956 | | | 11 | | | | 99% | |
|  | P43-01-27 | | 48 | | 559 | | | 0.09 | | | 0.0729 | | | 0.0013 | 1.6448 | 0.0309 | | 0.1630 | | | 0.0014 | | | 0.0474 | | | 0.0011 | | | 1013 | | 36 | | | 988 | | | 12 | | 973 | | | 8 | | | | 98% | |
|  | P43-01-28 | | 120 | | 205 | | | 0.58 | | | 0.1726 | | | 0.0030 | 10.7920 | 0.1902 | | 0.4519 | | | 0.0036 | | | 0.1256 | | | 0.0021 | | | 2583 | | 29 | | | 2505 | | | 16 | | 2404 | | | 16 | | | | 95% | |
|  | P43-01-29 | | 99 | | 184 | | | 0.53 | | | 0.0745 | | | 0.0018 | 1.5672 | 0.0380 | | 0.1522 | | | 0.0014 | | | 0.0472 | | | 0.0009 | | | 1054 | | 48 | | | 957 | | | 15 | | 914 | | | 8 | | | | 95% | |
|  | P43-01-30 | | 331 | | 475 | | | 0.70 | | | 0.0752 | | | 0.0012 | 1.6864 | 0.0300 | | 0.1618 | | | 0.0014 | | | 0.0486 | | | 0.0008 | | | 1074 | | 33 | | | 1003 | | | 11 | | 967 | | | 8 | | | | 96% | |
|  | P43-01-31 | | 120 | | 100 | | | 1.20 | | | 0.0917 | | | 0.0021 | 3.0863 | 0.0713 | | 0.2432 | | | 0.0022 | | | 0.0717 | | | 0.0012 | | | 1461 | | 43 | | | 1429 | | | 18 | | 1403 | | | 12 | | | | 98% | |
|  | P43-01-32 | | 66 | | 97 | | | 0.68 | | | 0.0745 | | | 0.0020 | 1.6467 | 0.0447 | | 0.1594 | | | 0.0016 | | | 0.0499 | | | 0.0010 | | | 1057 | | 49 | | | 988 | | | 17 | | 954 | | | 9 | | | | 96% | |
|  | P43-01-33 | | 140 | | 292 | | | 0.48 | | | 0.0750 | | | 0.0014 | 1.6747 | 0.0339 | | 0.1609 | | | 0.0015 | | | 0.0493 | | | 0.0008 | | | 1133 | | 39 | | | 999 | | | 13 | | 962 | | | 8 | | | | 96% | |
|  | P43-01-34 | | 159 | | 118 | | | 1.35 | | | 0.0714 | | | 0.0021 | 1.5972 | 0.0437 | | 0.1624 | | | 0.0018 | | | 0.0487 | | | 0.0009 | | | 969 | | 60 | | | 969 | | | 17 | | 970 | | | 10 | | | | 99% | |
|  | P43-01-35 | | 185 | | 209 | | | 0.89 | | | 0.1649 | | | 0.0031 | 10.4555 | 0.2035 | | 0.4564 | | | 0.0044 | | | 0.1306 | | | 0.0023 | | | 2507 | | 31 | | | 2476 | | | 18 | | 2423 | | | 20 | | | | 97% | |
|  | P43-01-36 | | 291 | | 290 | | | 1.00 | | | 0.0629 | | | 0.0014 | 1.1094 | 0.0255 | | 0.1271 | | | 0.0013 | | | 0.0400 | | | 0.0007 | | | 706 | | 48 | | | 758 | | | 12 | | 771 | | | 8 | | | | 98% | |
|  | Spot. | | Content（ppm） | | | | | Ration | | | Isotopic ration | | | | | | | | | | | | | | | | | | | Apparent ages（Ma） | | | | | | | | | | | | | | | | | | |
|  | Th | | U | | | Th/U | | | 207Pb/  206Pb | | | 1σ | 207Pb/  235U | 1σ | | 206Pb/  238U | | | 1σ | | | 208Pb/  232Th | | | 1σ | | | 207Pb/  206Pb | | 1σ | | | 207Pb/  235U | | | 1σ | | 206Pb/  238U | | | 1σ | | | | Concordance | |
|  | P43-01-37 | | 159 | | 210 | | | 0.76 | | | 0.0699 | | | 0.0017 | 1.3831 | 0.0345 | | 0.1426 | | | 0.0015 | | | 0.0448 | | | 0.0008 | | | 926 | | 50 | | | 882 | | | 15 | | 860 | | | 8 | | | | 97% | |
|  | P43-01-38 | | 122 | | 233 | | | 0.53 | | | 0.1810 | | | 0.0027 | 12.3603 | 0.1959 | | 0.4920 | | | 0.0041 | | | 0.1387 | | | 0.0022 | | | 2662 | | 25 | | | 2632 | | | 15 | | 2579 | | | 18 | | | | 97% | |
|  | P43-01-39 | | 38 | | 108 | | | 0.35 | | | 0.1725 | | | 0.0032 | 10.8427 | 0.1974 | | 0.4544 | | | 0.0041 | | | 0.1270 | | | 0.0026 | | | 2583 | | 31 | | | 2510 | | | 17 | | 2415 | | | 18 | | | | 96% | |
|  | P43-01-40 | | 221 | | 352 | | | 0.63 | | | 0.0603 | | | 0.0014 | 0.8666 | 0.0195 | | 0.1039 | | | 0.0009 | | | 0.0327 | | | 0.0006 | | | 613 | | 48 | | | 634 | | | 11 | | 637 | | | 6 | | | | 99% | |
|  | P43-01-41 | | 216 | | 310 | | | 0.70 | | | 0.0677 | | | 0.0013 | 1.3017 | 0.0252 | | 0.1387 | | | 0.0012 | | | 0.0443 | | | 0.0007 | | | 861 | | 42 | | | 846 | | | 11 | | 837 | | | 7 | | | | 98% | |
|  | P43-01-42 | | 83 | | 182 | | | 0.45 | | | 0.0661 | | | 0.0017 | 1.2082 | 0.0310 | | 0.1319 | | | 0.0013 | | | 0.0402 | | | 0.0008 | | | 811 | | 49 | | | 804 | | | 14 | | 799 | | | 7 | | | | 99% | |
|  | P43-01-43 | | 89 | | 199 | | | 0.45 | | | 0.0898 | | | 0.0019 | 2.7949 | 0.0573 | | 0.2244 | | | 0.0022 | | | 0.0671 | | | 0.0012 | | | 1421 | | 40 | | | 1354 | | | 15 | | 1305 | | | 12 | | | | 96% | |
|  | P43-01-44 | | 159 | | 224 | | | 0.71 | | | 0.0703 | | | 0.0017 | 1.5313 | 0.0364 | | 0.1568 | | | 0.0015 | | | 0.0505 | | | 0.0009 | | | 939 | | 49 | | | 943 | | | 15 | | 939 | | | 9 | | | | 99% | |
|  | P43-01-45 | | 165 | | 119 | | | 1.39 | | | 0.0721 | | | 0.0022 | 1.6092 | 0.0478 | | 0.1612 | | | 0.0018 | | | 0.0523 | | | 0.0010 | | | 987 | | 63 | | | 974 | | | 19 | | 964 | | | 10 | | | | 98% | |
|  | P43-01-46 | | 105 | | 142 | | | 0.74 | | | 0.0650 | | | 0.0019 | 1.1416 | 0.0335 | | 0.1267 | | | 0.0014 | | | 0.0406 | | | 0.0008 | | | 776 | | 62 | | | 773 | | | 16 | | 769 | | | 8 | | | | 99% | |
|  | P43-01-47 | | 166 | | 176 | | | 0.94 | | | 0.0695 | | | 0.0018 | 1.2381 | 0.0327 | | 0.1285 | | | 0.0013 | | | 0.0411 | | | 0.0008 | | | 922 | | 54 | | | 818 | | | 15 | | 779 | | | 7 | | | | 95% | |
|  | P43-01-48 | | 142 | | 261 | | | 0.55 | | | 0.0726 | | | 0.0016 | 1.5891 | 0.0373 | | 0.1578 | | | 0.0015 | | | 0.0474 | | | 0.0009 | | | 1011 | | 44 | | | 966 | | | 15 | | 945 | | | 8 | | | | 97% | |
|  | P43-01-49 | | 218 | | 90 | | | 2.42 | | | 0.1011 | | | 0.0020 | 3.7034 | 0.0796 | | 0.2645 | | | 0.0026 | | | 0.0798 | | | 0.0013 | | | 1644 | | 37 | | | 1572 | | | 17 | | 1513 | | | 13 | | | | 96% | |
|  | P43-01-50 | | 65.9 | | 140 | | | 0.47 | | | 0.1648 | | | 0.0026 | 10.8597 | 0.1906 | | 0.4759 | | | 0.0045 | | | 0.1330 | | | 0.0024 | | | 2506 | | 27 | | | 2511 | | | 16 | | 2510 | | | 20 | | | | 99% | |
|  | P43-01-51 | | 136 | | 1047 | | | 0.13 | | | 0.1570 | | | 0.0024 | 9.8440 | 0.1664 | | 0.4534 | | | 0.0039 | | | 0.1120 | | | 0.0021 | | | 2424 | | 26 | | | 2420 | | | 16 | | 2410 | | | 17 | | | | 99% | |
|  | P43-01-52 | | 269 | | 277 | | | 0.97 | | | 0.1939 | | | 0.0032 | 14.4659 | 0.2552 | | 0.5398 | | | 0.0047 | | | 0.1465 | | | 0.0026 | | | 2776 | | 26 | | | 2781 | | | 17 | | 2782 | | | 20 | | | | 99% | |
|  | P43-01-53 | | 215 | | 283 | | | 0.76 | | | 0.0755 | | | 0.0014 | 1.9810 | 0.0398 | | 0.1899 | | | 0.0016 | | | 0.0580 | | | 0.0010 | | | 1083 | | 38 | | | 1109 | | | 14 | | 1121 | | | 9 | | | | 98% | |
|  | P43-01-54 | | 281 | | 352 | | | 0.80 | | | 0.0768 | | | 0.0014 | 2.0505 | 0.0406 | | 0.1932 | | | 0.0019 | | | 0.0590 | | | 0.0010 | | | 1117 | | 36 | | | 1132 | | | 14 | | 1139 | | | 10 | | | | 99% | |
|  | P43-01-55 | | 171 | | 228 | | | 0.75 | | | 0.0872 | | | 0.0017 | 3.0231 | 0.0601 | | 0.2510 | | | 0.0025 | | | 0.0712 | | | 0.0012 | | | 1366 | | 41 | | | 1413 | | | 15 | | 1443 | | | 13 | | | | 97% | |
|  | P43-01-56 | | 166 | | 106 | | | 1.56 | | | 0.0761 | | | 0.0020 | 1.9346 | 0.0518 | | 0.1839 | | | 0.0020 | | | 0.0559 | | | 0.0011 | | | 1098 | | 47 | | | 1093 | | | 18 | | 1088 | | | 11 | | | | 99% | |
|  | P43-01-57 | | 275 | | 672 | | | 0.41 | | | 0.0561 | | | 0.0013 | 0.7024 | 0.0173 | | 0.0904 | | | 0.0008 | | | 0.0271 | | | 0.0005 | | | 454 | | 19 | | | 540 | | | 10 | | 558 | | | 5 | | | | 96% | |
|  | Spot. | | Content（ppm） | | | | | Ration | | | Isotopic ration | | | | | | | | | | | | | | | | | | | Apparent ages（Ma） | | | | | | | | | | | | | | | | | | |
|  | Th | | U | | | Th/U | | | 207Pb/  206Pb | | | 1σ | 207Pb/  235U | 1σ | | 206Pb/  238U | | | 1σ | | | 208Pb/  232Th | | | 1σ | | | 207Pb/  206Pb | | 1σ | | | 207Pb/  235U | | | 1σ | | 206Pb/  238U | | | 1σ | | | | Concordance | |
|  | P43-01-58 | | 191 | | 500 | | | 0.38 | | | 0.0773 | | | 0.0016 | 2.1578 | 0.0463 | | 0.2014 | | | 0.0017 | | | 0.0595 | | | 0.0011 | | | 1129 | | 43 | | | 1168 | | | 15 | | 1183 | | | 9 | | | | 98% | |
|  | P43-01-59 | | 128 | | 183 | | | 0.70 | | | 0.1752 | | | 0.0031 | 11.3470 | 0.2292 | | 0.4665 | | | 0.0042 | | | 0.1268 | | | 0.0021 | | | 2609 | | 31 | | | 2552 | | | 19 | | 2468 | | | 18 | | | | 96% | |
|  | P43-01-60 | | 152 | | 167 | | | 0.91 | | | 0.0579 | | | 0.0019 | 0.7007 | 0.0224 | | 0.0879 | | | 0.0009 | | | 0.0272 | | | 0.0006 | | | 528 | | 72 | | | 539 | | | 13 | | 543 | | | 6 | | | | 99% | |
|  | P43-01-61 | | 134 | | 306 | | | 0.44 | | | 0.1621 | | | 0.0026 | 10.1098 | 0.1776 | | 0.4504 | | | 0.0046 | | | 0.1107 | | | 0.0020 | | | 2477 | | 28 | | | 2445 | | | 16 | | 2397 | | | 21 | | | | 98% | |
|  | P43-01-62 | | 107 | | 502 | | | 0.21 | | | 0.0703 | | | 0.0013 | 1.5668 | 0.0299 | | 0.1608 | | | 0.0013 | | | 0.0486 | | | 0.0009 | | | 939 | | 38 | | | 957 | | | 12 | | 961 | | | 7 | | | | 99% | |
|  | P43-01-63 | | 278 | | 356 | | | 0.78 | | | 0.0647 | | | 0.0016 | 1.0506 | 0.0251 | | 0.1175 | | | 0.0011 | | | 0.0366 | | | 0.0007 | | | 765 | | 45 | | | 729 | | | 12 | | 716 | | | 6 | | | | 98% | |
|  | P43-01-64 | | 18.7 | | 42.2 | | | 0.44 | | | 0.0658 | | | 0.0036 | 0.9307 | 0.0509 | | 0.1030 | | | 0.0015 | | | 0.0340 | | | 0.0013 | | | 1200 | | 113 | | | 668 | | | 27 | | 632 | | | 9 | | | | 94% | |
|  | P43-01-65 | | 524 | | 244 | | | 2.15 | | | 0.0769 | | | 0.0018 | 1.6045 | 0.0355 | | 0.1511 | | | 0.0014 | | | 0.0261 | | | 0.0015 | | | 1118 | | 46 | | | 972 | | | 14 | | 907 | | | 8 | | | | 93% | |
|  | P43-01-66 | | 109 | | 145 | | | 0.75 | | | 0.0718 | | | 0.0018 | 1.5923 | 0.0393 | | 0.1604 | | | 0.0015 | | | 0.0487 | | | 0.0009 | | | 981 | | 52 | | | 967 | | | 15 | | 959 | | | 8 | | | | 99% | |
|  | P43-01-68 | | 27.9 | | 39.3 | | | 0.71 | | | 0.1638 | | | 0.0039 | 10.1370 | 0.2361 | | 0.4480 | | | 0.0049 | | | 0.1239 | | | 0.0025 | | | 2495 | | 40 | | | 2447 | | | 22 | | 2386 | | | 22 | | | | 97% | |
|  | P43-01-69 | | 163 | | 239 | | | 0.68 | | | 0.0641 | | | 0.0018 | 1.0754 | 0.0305 | | 0.1212 | | | 0.0013 | | | 0.0367 | | | 0.0007 | | | 746 | | 61 | | | 741 | | | 15 | | 738 | | | 7 | | | | 99% | |
|  | P43-01-70 | | 14.7 | | 39.6 | | | 0.37 | | | 0.1613 | | | 0.0040 | 10.6160 | 0.2544 | | 0.4765 | | | 0.0054 | | | 0.1355 | | | 0.0042 | | | 2469 | | 42 | | | 2490 | | | 22 | | 2512 | | | 23 | | | | 99% | |
|  | P43-01-71 | | 506 | | 311 | | | 1.63 | | | 0.1485 | | | 0.0026 | 7.5549 | 0.1347 | | 0.3669 | | | 0.0030 | | | 0.1019 | | | 0.0015 | | | 2329 | | 30 | | | 2180 | | | 16 | | 2015 | | | 14 | | | | 92% | |
|  | P43-01-72 | | 69.0 | | 86.3 | | | 0.80 | | | 0.1657 | | | 0.0032 | 11.1960 | 0.2147 | | 0.4888 | | | 0.0048 | | | 0.1321 | | | 0.0023 | | | 2515 | | 32 | | | 2540 | | | 18 | | 2565 | | | 21 | | | | 98% | |
|  | P43-01-73 | | 58.1 | | 142 | | | 0.41 | | | 0.1875 | | | 0.0031 | 13.5036 | 0.2301 | | 0.5204 | | | 0.0045 | | | 0.1385 | | | 0.0023 | | | 2721 | | 27 | | | 2716 | | | 16 | | 2701 | | | 19 | | | | 99% | |
|  | P43-01-74 | | 304 | | 565 | | | 0.54 | | | 0.0724 | | | 0.0014 | 1.6216 | 0.0331 | | 0.1619 | | | 0.0014 | | | 0.0482 | | | 0.0008 | | | 998 | | 35 | | | 979 | | | 13 | | 967 | | | 8 | | | | 98% | |
|  | P43-01-75 | | 101 | | 260 | | | 0.39 | | | 0.1680 | | | 0.0031 | 11.2193 | 0.2187 | | 0.4832 | | | 0.0045 | | | 0.1355 | | | 0.0026 | | | 2539 | | 31 | | | 2542 | | | 18 | | 2541 | | | 20 | | | | 99% | |
|  | P43-01-76 | | 127 | | 359 | | | 0.35 | | | 0.0798 | | | 0.0016 | 2.3355 | 0.0494 | | 0.2118 | | | 0.0019 | | | 0.0634 | | | 0.0013 | | | 1192 | | 41 | | | 1223 | | | 15 | | 1239 | | | 10 | | | | 98% | |
|  | P43-01-77 | | 12.8 | | 644 | | | 0.02 | | | 0.0952 | | | 0.0016 | 3.2371 | 0.0559 | | 0.2458 | | | 0.0018 | | | 0.0702 | | | 0.0022 | | | 1532 | | 33 | | | 1466 | | | 13 | | 1417 | | | 9 | | | | 96% | |
|  | P43-01-78 | | 271 | | 762 | | | 0.36 | | | 0.1635 | | | 0.0023 | 10.3923 | 0.1688 | | 0.4589 | | | 0.0043 | | | 0.1274 | | | 0.0022 | | | 2492 | | 19 | | | 2470 | | | 15 | | 2435 | | | 19 | | | | 98% | |
|  | P43-01-79 | | 91 | | 229 | | | 0.40 | | | 0.1094 | | | 0.0018 | 4.4453 | 0.0739 | | 0.2935 | | | 0.0025 | | | 0.0860 | | | 0.0015 | | | 1791 | | 29 | | | 1721 | | | 14 | | 1659 | | | 13 | | | | 96% | |
|  | P43-01-80 | | 63.0 | | 99 | | | 0.63 | | | 0.0682 | | | 0.0024 | 1.1766 | 0.0387 | | 0.1253 | | | 0.0014 | | | 0.0390 | | | 0.0008 | | | 876 | | -127 | | | 790 | | | 18 | | 761 | | | 8 | | | | 96% | |
|  | P43-01-81 | | 354 | | 655 | | | 0.54 | | | 0.0708 | | | 0.0013 | 1.5282 | 0.0305 | | 0.1555 | | | 0.0017 | | | 0.0491 | | | 0.0010 | | | 951 | | 34 | | | 942 | | | 12 | | 932 | | | 9 | | | | 98% | |
|  | P43-01-82 | | 882 | | 662 | | | 1.33 | | | 0.0763 | | | 0.0014 | 1.5047 | 0.0320 | | 0.1418 | | | 0.0019 | | | 0.0360 | | | 0.0009 | | | 1106 | | 4 | | | 932 | | | 13 | | 855 | | | 11 | | | | 91% | |
|  | P43-01-83 | | 369 | | 382 | | | 0.97 | | | 0.1279 | | | 0.0021 | 6.5493 | 0.1070 | | 0.3683 | | | 0.0029 | | | 0.1035 | | | 0.0017 | | | 2070 | | 28 | | | 2053 | | | 14 | | 2022 | | | 14 | | | | 98% | |
|  | P43-01-84 | | 187 | | 78.2 | | | 2.40 | | | 0.0571 | | | 0.0025 | 0.6874 | 0.0277 | | 0.0879 | | | 0.0011 | | | 0.0273 | | | 0.0005 | | | 494 | | 94 | | | 531 | | | 17 | | 543 | | | 6 | | | | 97% | |
|  | P43-01-85 | | 217 | | 130 | | | 1.67 | | | 0.1661 | | | 0.0028 | 10.3751 | 0.1754 | | 0.4492 | | | 0.0036 | | | 0.1249 | | | 0.0019 | | | 2520 | | 28 | | | 2469 | | | 16 | | 2392 | | | 16 | | | | 96% | |
|  | P43-01-86 | | 177 | | 282 | | | 0.63 | | | 0.0705 | | | 0.0016 | 1.4486 | 0.0324 | | 0.1480 | | | 0.0014 | | | 0.0448 | | | 0.0008 | | | 944 | | 46 | | | 909 | | | 13 | | 890 | | | 8 | | | | 97% | |
|  | P43-01-87 | | 49.3 | | 60.1 | | | 0.82 | | | 0.1037 | | | 0.0027 | 3.9884 | 0.1028 | | 0.2775 | | | 0.0032 | | | 0.0794 | | | 0.0016 | | | 1692 | | 48 | | | 1632 | | | 21 | | 1579 | | | 16 | | | | 96% | |
|  | P43-01-88 | | 256 | | 316 | | | 0.81 | | | 0.0669 | | | 0.0016 | 1.2077 | 0.0291 | | 0.1300 | | | 0.0012 | | | 0.0399 | | | 0.0008 | | | 833 | | 50 | | | 804 | | | 13 | | 788 | | | 7 | | | | 97% | |
|  | P43-01-89 | | 66.2 | | 105 | | | 0.63 | | | 0.0654 | | | 0.0020 | 1.1381 | 0.0343 | | 0.1254 | | | 0.0014 | | | 0.0400 | | | 0.0009 | | | 787 | | 65 | | | 772 | | | 16 | | 762 | | | 8 | | | | 98% | |
|  | P43-01-90 | | 76.7 | | 218 | | | 0.35 | | | 0.0606 | | | 0.0015 | 0.8997 | 0.0240 | | 0.1069 | | | 0.0012 | | | 0.0322 | | | 0.0007 | | | 633 | | 56 | | | 652 | | | 13 | | 655 | | | 7 | | | | 99% | |
|  | P43-01-91 | | 73.3 | | 378 | | | 0.19 | | | 0.0722 | | | 0.0014 | 1.6842 | 0.0328 | | 0.1681 | | | 0.0015 | | | 0.0480 | | | 0.0010 | | | 991 | | 38 | | | 1003 | | | 12 | | 1002 | | | 8 | | | | 99% | |

Supplementary Table 4 Trace elements data of detrital zircons of clastic sedimentary rocks from Jinggangshan area, Cathaysia Block

| Content（ppm） | | | | | | | | | | | | | | |
| --- | --- | --- | --- | --- | --- | --- | --- | --- | --- | --- | --- | --- | --- | --- |
| Spot. | La | Ce | Pr | Nd | Sm | Eu | Gd | Tb | Dy | Ho | Er | Tm | Yb | Lu |
| **Sample P40-01: Early Cambrian sandstone from Cathaysia block (N26°35′49.56″, E114°32′13.71″)** | | | | | | | | | | | | | | |
| P40-01-01 | 0.019 | 13.22 | 0.12 | 0.71 | 2.24 | 0.68 | 8.13 | 2.61 | 28.23 | 11.69 | 49.91 | 11.64 | 119.84 | 22.11 |
| P40-01-02 | 0.0069 | 1.44 | 0.05 | 0.83 | 2.95 | 0.14 | 20.79 | 8.00 | 96.87 | 35.44 | 152.76 | 30.39 | 266.11 | 52.88 |
| P40-01-03 | 0.0070 | 18.88 | 0.09 | 1.16 | 3.63 | 0.17 | 17.13 | 6.24 | 72.74 | 28.03 | 130.44 | 27.86 | 255.99 | 52.62 |
| P40-01-04 | 0.39 | 4.49 | 0.59 | 4.58 | 7.23 | 1.34 | 32.62 | 9.98 | 99.41 | 31.89 | 126.02 | 24.93 | 215.93 | 42.32 |
| P40-01-05 | 0.013 | 0.28 | 0.01 | 0.11 | 0.39 | 0.04 | 4.56 | 2.89 | 51.04 | 25.00 | 140.68 | 38.52 | 437.64 | 98.72 |
| P40-01-06 | 0.74 | 14.75 | 0.93 | 7.09 | 6.43 | 1.56 | 32.37 | 11.76 | 153.22 | 59.27 | 276.46 | 59.42 | 523.19 | 101.04 |
| P40-01-07 | 0.0069 | 2.81 | 0.13 | 2.35 | 4.49 | 0.07 | 33.63 | 11.63 | 143.43 | 52.07 | 223.27 | 43.70 | 379.23 | 73.56 |
| P40-01-08 | 0.0000 | 14.72 | 0.06 | 1.14 | 2.19 | 0.14 | 13.62 | 4.62 | 53.11 | 20.40 | 89.22 | 18.82 | 164.39 | 33.51 |
| P40-01-09 | 0.0000 | 14.26 | 0.07 | 1.35 | 2.97 | 0.29 | 17.45 | 5.99 | 70.33 | 26.54 | 115.09 | 23.79 | 212.99 | 42.81 |
| P40-01-10 | 1.42 | 16.30 | 0.33 | 1.91 | 1.64 | 0.31 | 8.94 | 2.81 | 31.42 | 11.77 | 53.61 | 11.53 | 106.78 | 22.56 |
| P40-01-11 | 0.0000 | 8.34 | 0.09 | 1.26 | 2.42 | 0.04 | 14.68 | 5.42 | 62.94 | 24.00 | 107.21 | 22.33 | 195.91 | 38.58 |
| P40-01-12 | 0.042 | 7.46 | 0.05 | 1.02 | 1.76 | 0.28 | 14.19 | 4.97 | 61.04 | 25.50 | 119.53 | 26.21 | 248.25 | 54.40 |
| P40-01-13 | 0.010 | 5.55 | 0.30 | 5.72 | 12.91 | 0.59 | 52.78 | 13.38 | 113.23 | 31.64 | 107.48 | 18.32 | 135.62 | 24.84 |
| P40-01-14 | 0.0090 | 14.53 | 0.26 | 6.22 | 11.76 | 0.84 | 55.34 | 15.95 | 158.60 | 50.47 | 197.28 | 37.17 | 306.38 | 58.37 |
| P40-01-15 | 0.027 | 17.84 | 0.15 | 2.71 | 5.29 | 0.29 | 31.51 | 10.47 | 116.39 | 41.74 | 175.41 | 33.99 | 288.48 | 53.93 |
| P40-01-16 | 0.043 | 9.43 | 0.08 | 1.40 | 3.45 | 0.34 | 22.52 | 7.90 | 98.47 | 39.22 | 175.32 | 36.09 | 318.98 | 65.45 |
| P40-01-17 | 0.0000 | 40.49 | 0.05 | 1.23 | 2.50 | 0.38 | 16.10 | 5.88 | 72.80 | 28.61 | 131.60 | 28.80 | 266.79 | 56.36 |
| P40-01-18 | 0.0000 | 1.99 | 0.06 | 1.14 | 3.45 | 0.08 | 21.42 | 7.03 | 87.54 | 33.16 | 147.82 | 30.22 | 279.36 | 56.85 |
| Content（ppm） | | | | | | | | | | | | | | |
| Spot. | La | Ce | Pr | Nd | Sm | Eu | Gd | Tb | Dy | Ho | Er | Tm | Yb | Lu |
| P40-01-19 | 0.014 | 5.55 | 0.07 | 1.55 | 2.66 | 0.09 | 14.37 | 4.61 | 53.44 | 19.56 | 83.47 | 16.89 | 148.59 | 29.65 |
| P40-01-20 | 0.0067 | 6.57 | 0.09 | 0.94 | 2.40 | 0.17 | 12.78 | 3.80 | 44.24 | 16.98 | 72.91 | 14.63 | 130.63 | 26.77 |
| P40-01-22 | 0.039 | 20.70 | 0.08 | 1.16 | 2.52 | 0.19 | 17.42 | 5.88 | 70.81 | 26.87 | 122.14 | 24.61 | 220.26 | 43.54 |
| P40-01-23 | 1.38 | 12.89 | 1.78 | 11.92 | 10.41 | 2.62 | 40.76 | 13.05 | 131.41 | 38.24 | 142.12 | 26.28 | 216.40 | 40.72 |
| P40-01-24 | 0.0020 | 2.03 | 0.00 | 0.18 | 0.33 | 0.36 | 5.88 | 2.37 | 33.46 | 14.57 | 74.94 | 17.60 | 175.43 | 40.17 |
| P40-01-25 | 0.0000 | 1.02 | 0.02 | 0.74 | 2.88 | 0.08 | 23.31 | 9.28 | 101.50 | 31.15 | 115.10 | 20.40 | 163.74 | 30.13 |
| P40-01-27 | 0.013 | 5.93 | 0.05 | 1.62 | 4.14 | 0.50 | 19.50 | 6.10 | 67.53 | 24.02 | 99.61 | 19.65 | 168.72 | 34.07 |
| P40-01-28 | 7.35 | 21.53 | 2.12 | 12.81 | 9.03 | 0.94 | 43.43 | 13.52 | 152.67 | 56.28 | 234.47 | 44.73 | 379.13 | 73.87 |
| P40-01-29 | 0.0034 | 35.60 | 0.18 | 3.28 | 6.81 | 1.05 | 36.45 | 11.36 | 125.48 | 44.35 | 187.64 | 36.64 | 324.45 | 61.84 |
| P40-01-30 | 0.0034 | 20.10 | 0.08 | 1.45 | 2.48 | 0.33 | 13.34 | 4.11 | 48.24 | 18.06 | 80.56 | 16.82 | 154.11 | 31.94 |
| P40-01-31 | 0.0000 | 3.05 | 0.03 | 0.95 | 2.91 | 0.09 | 16.90 | 6.70 | 82.76 | 31.92 | 142.01 | 29.30 | 253.86 | 51.58 |
| P40-01-32 | 0.010 | 5.42 | 0.07 | 1.32 | 2.19 | 1.12 | 8.20 | 2.58 | 26.79 | 9.25 | 39.02 | 8.16 | 76.67 | 16.63 |
| P40-01-33 | 0.022 | 8.62 | 0.07 | 1.02 | 2.30 | 1.18 | 14.25 | 4.74 | 56.19 | 21.46 | 96.33 | 20.08 | 191.73 | 41.36 |
| P40-01-34 | 0.074 | 11.21 | 0.20 | 2.60 | 4.65 | 0.95 | 23.70 | 6.89 | 80.08 | 28.88 | 126.15 | 24.58 | 213.90 | 42.75 |
| P40-01-35 | 0.010 | 6.66 | 0.14 | 1.70 | 2.77 | 0.62 | 15.14 | 4.45 | 51.16 | 18.73 | 83.38 | 17.32 | 158.31 | 33.21 |
| P40-01-36 | 0.0099 | 4.57 | 0.11 | 1.36 | 2.79 | 0.22 | 15.84 | 5.09 | 60.08 | 21.87 | 95.86 | 18.71 | 164.27 | 33.39 |
| P40-01-37 | 0.0000 | 1.28 | 0.05 | 0.91 | 4.23 | 0.06 | 33.78 | 14.09 | 175.09 | 60.73 | 250.47 | 47.74 | 386.61 | 72.42 |
| P40-01-38 | 0.050 | 6.34 | 0.44 | 6.16 | 8.68 | 1.13 | 40.17 | 11.62 | 117.32 | 40.93 | 164.34 | 30.33 | 257.87 | 51.17 |
| P40-01-39 | 0.085 | 7.73 | 0.41 | 6.52 | 9.59 | 0.79 | 38.91 | 11.31 | 113.77 | 38.57 | 146.01 | 27.02 | 224.23 | 42.70 |
| P40-01-41 | 0.016 | 1.83 | 0.06 | 0.99 | 3.26 | 0.09 | 22.50 | 10.01 | 130.69 | 48.02 | 208.02 | 40.87 | 347.29 | 66.36 |
| P40-01-42 | 0.16 | 9.21 | 0.19 | 1.94 | 4.20 | 0.17 | 23.84 | 8.13 | 100.29 | 38.05 | 167.01 | 34.36 | 298.63 | 57.67 |
| P40-01-43 | 0.074 | 6.45 | 0.63 | 9.31 | 12.65 | 1.71 | 48.11 | 13.45 | 136.31 | 44.06 | 171.79 | 32.21 | 269.08 | 52.06 |
| Content（ppm） | | | | | | | | | | | | | | |
| Spot. | La | Ce | Pr | Nd | Sm | Eu | Gd | Tb | Dy | Ho | Er | Tm | Yb | Lu |
| P40-01-44 | 0.0032 | 36.98 | 0.18 | 3.42 | 4.33 | 1.12 | 22.29 | 5.93 | 62.15 | 21.41 | 89.60 | 17.49 | 151.12 | 30.58 |
| P40-01-45 | 0.6472 | 9.26 | 0.65 | 3.83 | 1.66 | 0.42 | 4.78 | 1.76 | 19.80 | 7.96 | 48.61 | 12.12 | 148.07 | 33.09 |
| P40-01-46 | 0.0034 | 2.84 | 0.14 | 1.94 | 4.82 | 0.07 | 25.93 | 9.09 | 110.66 | 41.22 | 181.37 | 35.79 | 309.94 | 59.27 |
| P40-01-47 | 0.0000 | 7.41 | 0.07 | 1.28 | 3.02 | 0.36 | 15.94 | 5.34 | 62.14 | 22.37 | 96.60 | 19.41 | 171.74 | 34.19 |
| P40-01-48 | 0.017 | 18.86 | 0.30 | 4.89 | 7.76 | 0.50 | 37.98 | 12.29 | 137.42 | 49.82 | 213.73 | 42.48 | 364.78 | 70.97 |
| P40-01-49 | 0.097 | 15.35 | 0.59 | 8.73 | 10.04 | 1.13 | 41.07 | 11.55 | 122.98 | 42.97 | 178.20 | 34.62 | 301.33 | 59.05 |
| P40-01-50 | 0.016 | 15.24 | 0.09 | 1.71 | 3.44 | 0.35 | 17.74 | 6.08 | 71.03 | 27.31 | 124.48 | 26.15 | 245.64 | 51.59 |
| P40-01-51 | 0.0000 | 5.90 | 0.08 | 1.17 | 4.24 | 0.14 | 30.14 | 12.97 | 177.03 | 73.60 | 352.58 | 75.91 | 689.63 | 135.81 |
| P40-01-52 | 0.024 | 16.95 | 0.25 | 4.28 | 9.57 | 2.09 | 46.74 | 13.62 | 154.27 | 54.91 | 229.01 | 45.46 | 390.47 | 80.31 |
| P40-01-53 | 0.0099 | 16.17 | 0.10 | 1.49 | 2.65 | 0.25 | 12.81 | 3.84 | 43.78 | 15.50 | 64.94 | 12.74 | 110.88 | 22.07 |
| P40-01-54 | 0.044 | 19.70 | 0.09 | 1.67 | 2.15 | 0.37 | 10.41 | 3.53 | 40.33 | 15.85 | 73.19 | 15.70 | 142.16 | 29.80 |
| P40-01-55 | 0.40 | 36.29 | 0.26 | 2.19 | 2.78 | 0.98 | 13.13 | 3.80 | 45.24 | 17.06 | 81.45 | 18.40 | 182.68 | 40.43 |
| P40-01-56 | 0.013 | 1.75 | 0.04 | 0.97 | 4.49 | 0.06 | 29.46 | 12.30 | 151.58 | 55.79 | 238.65 | 46.39 | 397.08 | 76.52 |
| P40-01-57 | 0.029 | 2.67 | 0.16 | 1.95 | 2.96 | 0.11 | 12.89 | 3.46 | 36.09 | 12.39 | 51.98 | 10.57 | 85.25 | 18.66 |
| P40-01-58 | 0.032 | 6.99 | 0.30 | 3.57 | 5.72 | 0.40 | 24.73 | 7.08 | 75.46 | 25.30 | 103.34 | 20.22 | 173.14 | 33.69 |
| P40-01-59 | 0.019 | 5.84 | 0.28 | 4.73 | 6.59 | 2.29 | 28.93 | 9.01 | 97.76 | 35.87 | 154.08 | 30.46 | 271.07 | 55.17 |
| P40-01-60 | 0.0020 | 2.77 | 0.05 | 0.68 | 2.70 | 0.11 | 18.51 | 6.03 | 58.86 | 17.03 | 60.95 | 10.32 | 84.52 | 15.80 |
| P40-01-61 | 0.53 | 13.48 | 0.42 | 3.30 | 3.63 | 0.88 | 16.42 | 5.50 | 68.04 | 27.28 | 130.88 | 29.47 | 285.16 | 62.96 |
| P40-01-62 | 0.033 | 45.83 | 0.15 | 3.69 | 4.66 | 1.56 | 26.15 | 7.82 | 81.56 | 26.21 | 127.15 | 25.63 | 253.88 | 51.17 |
| P40-01-63 | 0.003 | 4.25 | 0.07 | 1.63 | 4.92 | 0.10 | 31.84 | 12.33 | 149.64 | 54.59 | 237.00 | 47.13 | 402.15 | 77.04 |
| P40-01-64 | 0.19 | 6.37 | 0.21 | 1.63 | 3.95 | 0.47 | 27.22 | 10.42 | 132.05 | 51.77 | 230.52 | 47.49 | 424.80 | 84.08 |
| P40-01-65 | 0.016 | 1.74 | 0.09 | 2.06 | 6.22 | 0.06 | 34.14 | 10.24 | 95.21 | 24.70 | 70.39 | 9.99 | 63.19 | 9.55 |
| Content（ppm） | | | | | | | | | | | | | | |
| Spot. | La | Ce | Pr | Nd | Sm | Eu | Gd | Tb | Dy | Ho | Er | Tm | Yb | Lu |
| P40-01-66 | 0.0000 | 18.55 | 0.08 | 1.16 | 2.88 | 0.56 | 16.80 | 5.35 | 66.94 | 25.74 | 116.77 | 25.29 | 235.47 | 49.55 |
| P40-01-67 | 0.06 | 28.69 | 0.11 | 1.22 | 2.85 | 0.70 | 14.37 | 4.98 | 61.17 | 23.00 | 103.94 | 22.61 | 213.62 | 46.33 |
| P40-01-68 | 0.20 | 9.25 | 0.41 | 2.88 | 4.81 | 0.68 | 23.23 | 9.33 | 125.01 | 49.38 | 236.33 | 49.89 | 470.76 | 94.72 |
| P40-01-69 | 0.05 | 5.83 | 0.33 | 4.89 | 8.81 | 1.02 | 36.89 | 11.56 | 124.12 | 43.58 | 177.66 | 33.79 | 287.96 | 57.56 |
| P40-01-70 | 3.8 | 20.01 | 1.45 | 9.98 | 8.91 | 0.73 | 39.91 | 11.95 | 132.53 | 45.71 | 189.54 | 36.31 | 311.64 | 61.35 |
| P40-01-71 | 0.004 | 7.51 | 0.08 | 1.54 | 3.50 | 0.54 | 23.05 | 7.73 | 90.58 | 33.40 | 145.35 | 29.27 | 254.45 | 51.65 |
| P40-01-72 | 0.006 | 9.58 | 0.06 | 0.95 | 2.66 | 0.26 | 18.69 | 6.49 | 79.27 | 30.08 | 130.27 | 25.41 | 218.44 | 42.19 |
| P40-01-73 | 0.33 | 20.99 | 0.20 | 2.03 | 3.67 | 0.36 | 16.18 | 5.50 | 62.81 | 23.26 | 102.52 | 21.29 | 182.09 | 36.30 |
| P40-01-74 | 0.0000 | 20.93 | 0.05 | 1.09 | 2.58 | 0.18 | 16.41 | 5.54 | 68.26 | 26.08 | 115.20 | 23.42 | 206.41 | 42.05 |
| P40-01-75 | 0.10 | 12.50 | 0.23 | 4.17 | 6.30 | 1.08 | 28.79 | 8.15 | 91.44 | 31.11 | 126.50 | 23.35 | 192.68 | 37.35 |
| P40-01-76 | 0.007 | 3.29 | 0.05 | 1.78 | 5.39 | 0.27 | 37.15 | 13.68 | 172.80 | 67.00 | 300.02 | 60.63 | 537.90 | 107.98 |
| P40-01-77 | 0.29 | 3.49 | 0.35 | 2.76 | 2.90 | 0.63 | 16.79 | 5.41 | 52.44 | 15.22 | 58.81 | 11.88 | 103.67 | 20.76 |
| P40-01-78 | 16.1 | 58.45 | 7.98 | 45.59 | 16.93 | 0.30 | 39.37 | 11.03 | 128.87 | 48.12 | 215.30 | 44.04 | 389.62 | 78.58 |
| P40-01-79 | 0.003 | 5.66 | 0.02 | 0.76 | 1.71 | 0.17 | 12.69 | 4.67 | 58.09 | 23.63 | 108.77 | 22.52 | 208.28 | 42.95 |
| P40-01-80 | 1.48 | 11.57 | 0.46 | 3.40 | 3.14 | 0.49 | 16.39 | 5.04 | 56.77 | 20.90 | 90.77 | 18.54 | 165.14 | 33.98 |
| P40-01-81 | 0.026 | 24.06 | 0.46 | 6.40 | 8.17 | 3.28 | 33.00 | 8.76 | 90.28 | 29.68 | 121.00 | 23.66 | 198.20 | 39.10 |
| P40-01-82 | 0.013 | 9.34 | 0.13 | 2.16 | 3.72 | 0.52 | 19.39 | 6.09 | 71.66 | 25.70 | 108.50 | 21.14 | 186.72 | 36.21 |
| P40-01-83 | 0.008 | 8.75 | 0.03 | 0.83 | 2.95 | 0.12 | 16.86 | 5.15 | 45.35 | 11.63 | 34.93 | 5.13 | 33.51 | 6.08 |
| P40-01-84 | 0.26 | 33.58 | 0.35 | 4.19 | 6.21 | 0.87 | 25.60 | 7.88 | 88.21 | 31.94 | 142.90 | 31.19 | 295.31 | 61.87 |
| P40-01-85 | 2.7 | 11.84 | 0.87 | 4.21 | 2.56 | 0.07 | 12.94 | 4.38 | 53.16 | 20.07 | 93.42 | 19.15 | 174.74 | 36.06 |
| P40-01-86 | 0.019 | 21.85 | 0.11 | 2.49 | 3.85 | 0.78 | 18.23 | 5.28 | 55.94 | 19.96 | 89.77 | 18.92 | 180.35 | 38.55 |
| Content（ppm） | | | | | | | | | | | | | | |
| Spot. | La | Ce | Pr | Nd | Sm | Eu | Gd | Tb | Dy | Ho | Er | Tm | Yb | Lu |
| **Sample P43-01: Late Sinian sandstone from Cathaysia block (N26°37′5.36″, E114°32′19.26″)** | | | | | | | | | | | | | | |
| P43-01-01 | 35 | 87.11 | 9.62 | 42.39 | 10.15 | 0.22 | 24.00 | 6.86 | 82.61 | 31.66 | 144.92 | 30.85 | 274.39 | 55.67 |
| P43-01-02 | 0.007 | 9.06 | 0.06 | 1.27 | 2.26 | 0.14 | 12.57 | 3.93 | 46.66 | 17.62 | 76.11 | 15.45 | 138.23 | 28.05 |
| P43-01-03 | 0.003 | 8.26 | 0.08 | 1.33 | 3.37 | 0.06 | 22.61 | 7.41 | 86.74 | 31.35 | 132.46 | 26.40 | 227.28 | 44.62 |
| P43-01-04 | 3.4 | 27.02 | 1.21 | 5.49 | 4.21 | 1.37 | 15.56 | 6.02 | 65.92 | 23.11 | 104.71 | 22.16 | 220.64 | 50.20 |
| P43-01-05 | 0.0000 | 8.63 | 0.03 | 0.71 | 1.44 | 0.57 | 8.36 | 2.73 | 36.49 | 15.20 | 73.53 | 17.50 | 178.29 | 42.45 |
| P43-01-06 | 0.04 | 83.56 | 0.30 | 4.58 | 7.80 | 1.31 | 35.02 | 10.34 | 109.01 | 39.50 | 161.82 | 31.36 | 261.99 | 52.86 |
| P43-01-07 | 118 | 209.31 | 19.45 | 65.36 | 10.65 | 2.01 | 20.05 | 4.89 | 51.50 | 18.40 | 80.28 | 16.94 | 151.11 | 32.57 |
| P43-01-08 | 0.0000 | 8.10 | 0.06 | 1.09 | 2.85 | 0.04 | 17.15 | 5.74 | 72.21 | 30.27 | 142.70 | 31.41 | 301.10 | 66.62 |
| P43-01-09 | 0.014 | 18.62 | 0.10 | 2.02 | 5.61 | 1.05 | 38.82 | 15.98 | 217.44 | 89.25 | 404.31 | 82.22 | 715.30 | 134.28 |
| P43-01-10 | 0.05 | 54.57 | 0.29 | 4.68 | 7.17 | 1.57 | 28.47 | 7.38 | 76.27 | 25.99 | 107.28 | 21.00 | 186.36 | 37.96 |
| P43-01-11 | 0.31 | 4.48 | 0.20 | 1.99 | 3.61 | 0.06 | 20.33 | 7.43 | 89.83 | 33.52 | 141.79 | 28.49 | 239.22 | 46.91 |
| P43-01-12 | 0.007 | 39.99 | 0.07 | 0.99 | 1.71 | 0.49 | 8.26 | 2.97 | 37.55 | 15.91 | 77.93 | 18.92 | 196.24 | 44.75 |
| P43-01-13 | 0.15 | 9.56 | 0.14 | 2.24 | 4.52 | 0.91 | 24.66 | 8.22 | 100.43 | 39.44 | 172.41 | 34.54 | 300.04 | 61.91 |
| P43-01-14 | 0.0000 | 8.11 | 0.11 | 1.65 | 3.17 | 1.01 | 14.19 | 4.52 | 57.08 | 23.97 | 114.50 | 27.18 | 265.96 | 62.50 |
| P43-01-15 | 0.006 | 8.01 | 0.23 | 4.17 | 10.53 | 0.99 | 62.64 | 23.13 | 275.46 | 102.23 | 431.24 | 83.60 | 687.33 | 130.44 |
| P43-01-16 | 0.010 | 7.33 | 0.03 | 0.59 | 1.18 | 0.22 | 5.57 | 2.11 | 24.63 | 9.41 | 42.60 | 9.13 | 79.81 | 15.68 |
| P43-01-17 | 0.0000 | 0.25 | 0.03 | 0.38 | 1.83 | 0.04 | 15.22 | 4.55 | 37.05 | 9.94 | 36.89 | 6.45 | 53.80 | 10.41 |
| P43-01-20 | 0.010 | 2.39 | 0.05 | 1.01 | 1.81 | 0.16 | 11.34 | 3.75 | 46.08 | 17.58 | 76.61 | 15.72 | 138.44 | 27.87 |
| P43-01-21 | 0.0000 | 12.12 | 0.04 | 0.73 | 0.93 | 0.23 | 7.17 | 2.39 | 25.78 | 9.70 | 44.59 | 9.41 | 88.28 | 19.13 |
| P43-01-22 | 32 | 89.77 | 11.55 | 56.01 | 14.51 | 0.76 | 21.76 | 5.49 | 59.34 | 21.06 | 90.77 | 18.11 | 159.52 | 32.08 |
| P43-01-23 | 0.021 | 8.38 | 0.33 | 6.64 | 10.05 | 0.89 | 40.71 | 11.73 | 124.65 | 43.91 | 177.59 | 33.56 | 278.19 | 55.06 |
| Content（ppm） | | | | | | | | | | | | | | |
| Spot. | La | Ce | Pr | Nd | Sm | Eu | Gd | Tb | Dy | Ho | Er | Tm | Yb | Lu |
| P43-01-24 | 0.009 | 35.04 | 0.07 | 0.99 | 1.03 | 0.30 | 6.09 | 1.92 | 19.99 | 7.67 | 34.58 | 7.65 | 74.72 | 16.55 |
| P43-01-25 | 0.017 | 12.93 | 0.28 | 4.63 | 6.31 | 0.37 | 27.64 | 7.85 | 87.41 | 31.01 | 127.62 | 25.51 | 225.11 | 46.56 |
| P43-01-26 | 0.0000 | 10.19 | 0.06 | 0.94 | 2.43 | 0.29 | 15.58 | 5.70 | 71.21 | 29.21 | 131.43 | 27.52 | 248.42 | 51.79 |
| P43-01-27 | 0.0000 | 0.64 | 0.04 | 0.70 | 3.04 | 0.11 | 23.56 | 8.52 | 81.22 | 23.62 | 79.66 | 13.79 | 110.45 | 19.54 |
| P43-01-28 | 0.16 | 4.62 | 0.09 | 1.41 | 2.95 | 0.61 | 17.41 | 6.43 | 84.87 | 36.93 | 172.03 | 35.91 | 317.45 | 66.18 |
| P43-01-29 | 0.0000 | 1.55 | 0.10 | 2.30 | 6.60 | 0.14 | 41.30 | 12.24 | 119.58 | 36.87 | 137.59 | 24.41 | 196.54 | 36.46 |
| P43-01-30 | 0.012 | 11.68 | 0.06 | 1.35 | 3.77 | 0.03 | 22.48 | 7.82 | 93.23 | 34.72 | 150.26 | 29.98 | 255.25 | 49.43 |
| P43-01-31 | 0.003 | 8.67 | 0.07 | 1.15 | 2.43 | 0.15 | 11.65 | 4.08 | 49.43 | 18.71 | 81.27 | 16.78 | 144.41 | 29.66 |
| P43-01-32 | 0.07 | 7.61 | 0.17 | 2.89 | 4.86 | 1.01 | 27.14 | 8.52 | 96.29 | 35.33 | 148.84 | 29.23 | 251.30 | 51.81 |
| P43-01-33 | 0.009 | 5.08 | 0.05 | 1.16 | 2.93 | 0.15 | 20.63 | 7.66 | 97.09 | 36.62 | 166.23 | 33.08 | 292.61 | 58.60 |
| P43-01-34 | 0.56 | 8.08 | 0.47 | 6.27 | 10.70 | 0.56 | 48.54 | 13.99 | 150.88 | 50.12 | 201.87 | 37.31 | 301.78 | 56.16 |
| P43-01-35 | 0.0021 | 32.36 | 0.05 | 1.25 | 2.52 | 0.45 | 13.68 | 4.35 | 51.22 | 18.67 | 84.83 | 18.27 | 166.98 | 35.04 |
| P43-01-36 | 0.04 | 81.70 | 0.05 | 1.20 | 3.09 | 0.71 | 17.87 | 7.21 | 101.92 | 46.19 | 241.16 | 56.63 | 548.33 | 123.53 |
| P43-01-37 | 0.0008 | 11.34 | 0.05 | 0.68 | 1.43 | 0.20 | 9.04 | 3.00 | 35.11 | 12.96 | 55.88 | 11.31 | 94.50 | 19.28 |
| P43-01-38 | 0.003 | 17.87 | 0.08 | 1.62 | 4.16 | 0.17 | 21.25 | 6.42 | 75.17 | 29.36 | 126.67 | 25.87 | 226.93 | 47.70 |
| P43-01-39 | 0.003 | 6.77 | 0.06 | 1.15 | 2.57 | 0.74 | 16.64 | 6.11 | 80.85 | 34.64 | 168.32 | 36.84 | 341.51 | 75.66 |
| P43-01-40 | 0.015 | 41.99 | 0.06 | 1.03 | 2.48 | 0.65 | 13.61 | 4.69 | 57.62 | 23.37 | 111.25 | 25.38 | 240.07 | 48.99 |
| P43-01-41 | 0.0059 | 14.25 | 0.07 | 0.74 | 0.98 | 0.60 | 5.92 | 1.67 | 20.03 | 8.15 | 43.21 | 10.98 | 123.65 | 34.93 |
| P43-01-42 | 0.0058 | 6.71 | 0.07 | 0.82 | 2.21 | 0.24 | 11.96 | 3.72 | 46.60 | 17.10 | 73.87 | 14.63 | 128.17 | 25.62 |
| P43-01-43 | 0.049 | 3.69 | 0.13 | 1.34 | 1.81 | 0.58 | 12.58 | 5.01 | 68.50 | 28.57 | 144.94 | 32.42 | 310.79 | 69.67 |
| P43-01-44 | 0.022 | 2.69 | 0.08 | 1.56 | 3.57 | 0.10 | 22.92 | 8.21 | 96.77 | 36.84 | 162.80 | 33.27 | 285.59 | 54.99 |
| P43-01-45 | 0.08 | 7.84 | 0.78 | 11.45 | 15.79 | 1.60 | 68.74 | 20.23 | 205.00 | 67.84 | 270.03 | 48.05 | 406.72 | 79.29 |
| Content（ppm） | | | | | | | | | | | | | | |
| Spot. | La | Ce | Pr | Nd | Sm | Eu | Gd | Tb | Dy | Ho | Er | Tm | Yb | Lu |
| P43-01-46 | 0.0035 | 10.68 | 0.05 | 1.12 | 1.95 | 0.25 | 12.41 | 4.55 | 51.02 | 19.64 | 86.28 | 17.64 | 161.23 | 32.27 |
| P43-01-47 | 0.0000 | 11.42 | 0.08 | 2.17 | 4.87 | 0.60 | 27.87 | 8.96 | 99.91 | 36.60 | 154.63 | 30.07 | 258.52 | 50.49 |
| P43-01-48 | 0.033 | 9.08 | 0.03 | 0.85 | 1.19 | 0.17 | 11.04 | 4.23 | 52.57 | 21.18 | 97.29 | 20.01 | 183.81 | 36.62 |
| P43-01-49 | 0.010 | 18.93 | 0.23 | 4.13 | 11.50 | 0.84 | 66.14 | 20.62 | 227.85 | 79.72 | 329.67 | 59.85 | 504.50 | 95.03 |
| P43-01-50 | 0.0000 | 3.77 | 0.02 | 0.46 | 0.89 | 0.05 | 8.14 | 2.72 | 35.31 | 14.18 | 72.60 | 15.82 | 145.47 | 30.29 |
| P43-01-51 | 0.10 | 7.03 | 0.22 | 2.71 | 5.48 | 1.58 | 27.31 | 9.86 | 106.53 | 37.49 | 178.13 | 38.18 | 359.74 | 72.63 |
| P43-01-52 | 0.0000 | 34.93 | 0.08 | 1.40 | 2.92 | 0.46 | 19.90 | 6.94 | 84.94 | 34.11 | 163.63 | 35.73 | 340.34 | 70.90 |
| P43-01-53 | 0.0000 | 10.48 | 0.08 | 0.99 | 2.51 | 0.44 | 10.72 | 3.38 | 38.16 | 13.89 | 62.43 | 12.93 | 125.79 | 26.84 |
| P43-01-54 | 0.0072 | 24.39 | 0.08 | 1.05 | 1.86 | 0.20 | 10.34 | 4.08 | 52.94 | 21.56 | 107.63 | 24.66 | 243.98 | 51.31 |
| P43-01-55 | 0.011 | 7.45 | 0.09 | 1.30 | 3.34 | 0.06 | 17.98 | 6.05 | 75.22 | 28.78 | 131.19 | 26.72 | 237.31 | 48.03 |
| P43-01-56 | 0.073 | 46.89 | 0.18 | 3.42 | 5.49 | 1.54 | 23.32 | 7.48 | 81.69 | 30.82 | 135.52 | 27.35 | 238.69 | 49.29 |
| P43-01-57 | 0.065 | 49.08 | 0.20 | 1.94 | 3.65 | 0.64 | 18.97 | 6.82 | 86.55 | 33.32 | 160.54 | 35.04 | 328.55 | 66.27 |
| P43-01-58 | 0.018 | 12.84 | 0.04 | 1.19 | 3.79 | 0.12 | 22.78 | 7.85 | 100.08 | 37.75 | 166.53 | 32.30 | 283.92 | 53.49 |
| P43-01-59 | 0.0000 | 10.40 | 0.01 | 0.27 | 0.88 | 0.25 | 5.38 | 2.09 | 24.80 | 10.20 | 46.32 | 9.40 | 84.60 | 17.35 |
| P43-01-60 | 0.008 | 22.20 | 0.13 | 2.38 | 3.50 | 0.80 | 16.51 | 5.73 | 61.22 | 22.34 | 101.92 | 21.65 | 203.47 | 41.85 |
| P43-01-61 | 0.09 | 19.01 | 0.12 | 1.13 | 1.44 | 0.51 | 8.40 | 2.99 | 36.03 | 13.47 | 64.56 | 14.84 | 145.25 | 31.36 |
| P43-01-62 | 0.47 | 2.30 | 0.22 | 2.09 | 6.98 | 0.12 | 42.20 | 13.80 | 124.94 | 31.74 | 96.10 | 15.00 | 107.87 | 17.00 |
| P43-01-63 | 0.010 | 8.69 | 0.26 | 4.40 | 10.90 | 0.06 | 53.22 | 17.49 | 195.56 | 71.24 | 303.61 | 59.67 | 520.52 | 100.64 |
| P43-01-64 | 0.014 | 3.81 | 0.21 | 3.53 | 5.33 | 0.87 | 24.27 | 7.53 | 77.25 | 26.54 | 111.96 | 21.43 | 188.64 | 38.53 |
| P43-01-65 | 0.91 | 20.64 | 0.89 | 8.52 | 18.57 | 8.10 | 73.32 | 22.98 | 242.94 | 78.24 | 297.08 | 54.64 | 445.31 | 82.14 |
| P43-01-66 | 2.22 | 18.28 | 0.70 | 4.33 | 6.25 | 0.29 | 31.22 | 10.61 | 124.70 | 46.46 | 205.41 | 40.91 | 364.04 | 72.91 |
| P43-01-68 | 0.0000 | 7.89 | 0.06 | 1.13 | 2.72 | 0.36 | 14.50 | 4.64 | 52.26 | 19.46 | 83.44 | 15.88 | 141.50 | 27.90 |
| Content（ppm） | | | | | | | | | | | | | | |
| Spot. | La | Ce | Pr | Nd | Sm | Eu | Gd | Tb | Dy | Ho | Er | Tm | Yb | Lu |
| P43-01-69 | 0.018 | 10.80 | 0.06 | 1.36 | 3.11 | 0.27 | 18.43 | 5.73 | 67.55 | 25.53 | 112.01 | 22.88 | 203.65 | 41.48 |
| P43-01-70 | 0.011 | 2.50 | 0.02 | 0.62 | 1.85 | 0.51 | 9.62 | 3.47 | 45.69 | 19.77 | 94.80 | 18.15 | 182.41 | 37.43 |
| P43-01-71 | 0.025 | 15.18 | 0.07 | 1.41 | 2.98 | 0.29 | 15.49 | 5.33 | 60.51 | 20.98 | 89.82 | 17.56 | 147.90 | 28.18 |
| P43-01-72 | 0.011 | 14.49 | 0.06 | 1.60 | 3.07 | 0.29 | 10.32 | 2.83 | 28.50 | 9.91 | 43.38 | 9.33 | 91.01 | 21.10 |
| P43-01-73 | 0.0073 | 4.03 | 0.05 | 0.52 | 1.52 | 0.32 | 10.78 | 3.60 | 44.66 | 18.28 | 82.29 | 16.70 | 153.94 | 31.74 |
| P43-01-74 | 20.0 | 65.20 | 6.12 | 28.60 | 10.72 | 0.18 | 40.52 | 14.58 | 188.20 | 73.80 | 339.15 | 68.08 | 599.37 | 116.74 |
| P43-01-75 | 0.0036 | 10.41 | 0.01 | 0.43 | 0.82 | 0.24 | 4.34 | 1.49 | 18.79 | 7.54 | 39.42 | 8.50 | 92.48 | 21.53 |
| P43-01-76 | 0.0000 | 9.90 | 0.05 | 1.16 | 1.88 | 0.19 | 11.11 | 3.71 | 40.56 | 14.49 | 60.70 | 12.15 | 108.18 | 21.08 |
| P43-01-77 | 0.0000 | 4.97 | 0.06 | 0.63 | 3.25 | 0.75 | 23.47 | 7.93 | 66.12 | 17.09 | 51.96 | 7.84 | 56.55 | 9.48 |
| P43-01-78 | 0.0071 | 15.52 | 0.06 | 1.33 | 3.23 | 0.34 | 20.14 | 7.24 | 85.70 | 31.58 | 137.68 | 27.02 | 235.36 | 45.88 |
| P43-01-79 | 0.0000 | 6.67 | 0.04 | 0.51 | 1.83 | 0.12 | 12.40 | 4.98 | 65.60 | 26.07 | 125.68 | 27.02 | 249.46 | 51.69 |
| P43-01-80 | 0.018 | 5.21 | 0.23 | 4.68 | 7.93 | 2.04 | 37.30 | 11.04 | 118.62 | 39.28 | 162.31 | 30.32 | 255.71 | 50.25 |
| P43-01-81 | 0.09 | 18.68 | 0.16 | 2.73 | 5.98 | 0.35 | 34.04 | 12.57 | 152.96 | 57.71 | 253.60 | 51.13 | 450.21 | 86.23 |
| P43-01-82 | 3.15 | 69.10 | 4.51 | 29.75 | 25.79 | 8.63 | 68.15 | 23.63 | 208.34 | 56.49 | 218.38 | 44.27 | 404.15 | 80.96 |
| P43-01-83 | 0.13 | 12.70 | 0.75 | 11.25 | 16.05 | 2.31 | 67.43 | 20.03 | 209.61 | 68.82 | 277.21 | 52.57 | 447.35 | 85.27 |
| P43-01-84 | 0.12 | 33.37 | 0.92 | 9.69 | 10.16 | 4.15 | 33.53 | 8.64 | 81.36 | 26.45 | 105.27 | 19.70 | 166.59 | 33.32 |
| P43-01-85 | 0.070 | 45.24 | 0.60 | 9.09 | 12.92 | 3.43 | 44.96 | 11.61 | 112.51 | 35.57 | 141.10 | 26.50 | 225.44 | 44.18 |
| P43-01-86 | 0.0000 | 15.81 | 0.03 | 0.67 | 1.41 | 0.25 | 8.44 | 3.87 | 39.61 | 16.47 | 83.49 | 20.41 | 220.05 | 43.70 |
| P43-01-87 | 0.034 | 19.20 | 0.04 | 0.95 | 2.04 | 0.73 | 13.10 | 4.40 | 51.36 | 20.50 | 92.39 | 20.45 | 191.71 | 40.83 |
| P43-01-88 | 0.0000 | 23.68 | 0.07 | 1.64 | 3.70 | 0.48 | 15.00 | 4.40 | 48.03 | 17.63 | 76.19 | 15.18 | 137.77 | 28.25 |
| P43-01-89 | 0.0036 | 9.55 | 0.15 | 2.42 | 3.83 | 0.41 | 21.88 | 7.54 | 87.18 | 31.78 | 139.96 | 28.54 | 258.51 | 51.98 |
| P43-01-90 | 0.015 | 7.73 | 0.07 | 1.70 | 2.90 | 0.45 | 14.87 | 4.35 | 43.40 | 14.70 | 60.80 | 11.92 | 107.63 | 21.32 |
| P43-01-91 | 0.0000 | 0.94 | 0.08 | 1.47 | 4.69 | 0.10 | 34.07 | 11.50 | 97.62 | 21.68 | 60.68 | 8.66 | 57.85 | 9.63 |

Supplementary Table 5 LA-MC-ICP-MS Lu-Hf isotopic data of standard zircon 91500 (reference 176Hf/177Hf value = 0.282308 ± 0.000006; Blichert-Toft, 2008)

| Spot. | 176Hf/177Hf | 1σ | 176Lu/177Hf | 1σ | 176Yb/177Hf | 1σ |
| --- | --- | --- | --- | --- | --- | --- |
| 91500 | 0.282311 | 0.000010 | 0.000288 | 0.000000 | 0.009901 | 0.000024 |
| 91500 | 0.282305 | 0.000010 | 0.000270 | 0.000000 | 0.009016 | 0.000029 |
| 91500 | 0.282309 | 0.000010 | 0.000288 | 0.000002 | 0.009818 | 0.000043 |
| 91500 | 0.282307 | 0.000009 | 0.000278 | 0.000000 | 0.009343 | 0.000010 |
| 91500 | 0.282307 | 0.000010 | 0.000275 | 0.000000 | 0.009177 | 0.000014 |
| 91500 | 0.282309 | 0.000009 | 0.000283 | 0.000001 | 0.009590 | 0.000040 |
| 91500 | 0.282309 | 0.000009 | 0.000294 | 0.000002 | 0.010265 | 0.000036 |
| 91500 | 0.282307 | 0.000009 | 0.000327 | 0.000001 | 0.011283 | 0.000008 |
| 91500 | 0.282302 | 0.000010 | 0.000277 | 0.000000 | 0.009640 | 0.000033 |
| 91500 | 0.282314 | 0.000010 | 0.000269 | 0.000000 | 0.008921 | 0.000014 |
| 91500 | 0.282309 | 0.000009 | 0.000288 | 0.000000 | 0.009694 | 0.000027 |
| 91500 | 0.282307 | 0.000009 | 0.000280 | 0.000000 | 0.009272 | 0.000014 |
| 91500 | 0.282313 | 0.000010 | 0.000286 | 0.000000 | 0.009467 | 0.000030 |
| 91500 | 0.282303 | 0.000010 | 0.000278 | 0.000001 | 0.009083 | 0.000022 |
| 91500 | 0.282308 | 0.000010 | 0.000300 | 0.000000 | 0.010197 | 0.000012 |
| 91500 | 0.282308 | 0.000010 | 0.000294 | 0.000000 | 0.009776 | 0.000016 |
| 91500 | 0.282304 | 0.000010 | 0.000276 | 0.000000 | 0.009134 | 0.000019 |
| 91500 | 0.282312 | 0.000010 | 0.000286 | 0.000000 | 0.010018 | 0.000035 |
| 91500 | 0.282310 | 0.000009 | 0.000286 | 0.000000 | 0.010018 | 0.000038 |
| 91500 | 0.282306 | 0.000009 | 0.000287 | 0.000000 | 0.010138 | 0.000041 |
| 91500 | 0.282305 | 0.000010 | 0.000284 | 0.000000 | 0.010144 | 0.000049 |
| 91500 | 0.282311 | 0.000010 | 0.000290 | 0.000001 | 0.010222 | 0.000027 |
| 91500 | 0.282306 | 0.000011 | 0.000282 | 0.000000 | 0.010046 | 0.000034 |
| 91500 | 0.282310 | 0.000010 | 0.000283 | 0.000000 | 0.010090 | 0.000040 |
| 91500 | 0.282315 | 0.000009 | 0.000286 | 0.000000 | 0.010214 | 0.000039 |
| 91500 | 0.282301 | 0.000009 | 0.000285 | 0.000000 | 0.009970 | 0.000027 |

Supplementary Table 6 LA-MC-ICP-MS Lu-Hf isotopic data of detrital zircons of clastic sedimentary rocks from Jinggangshan area, Cathaysia Block

| Spot. | 176Hf/177Hf | 1σ | 176Lu/177Hf | 1σ | 176Yb/177Hf | 1σ | Age (Ma) | εHf(0) | εHf(t) | TDM1 | TDM2 | fLu/Hf |
| --- | --- | --- | --- | --- | --- | --- | --- | --- | --- | --- | --- | --- |
| **Sample P40-01: Early Cambrian sandstone from Cathaysia block (N26°35′49.56″, E114°32′13.71″)** | | | | | | | | | | | | |
| P40-01-03 | 0.282462 | 0.000008 | 0.000805 | 0.000003 | 0.028717 | 0.000071 | 650 | -10.95 | 3.03 | 1111 | 1397 | -0.98 |
| P40-01-07 | 0.282026 | 0.000008 | 0.000924 | 0.000006 | 0.034821 | 0.000329 | 1080 | -26.37 | -3.14 | 1721 | 2124 | -0.97 |
| P40-01-08 | 0.281973 | 0.000008 | 0.000489 | 0.000003 | 0.017528 | 0.000149 | 751 | -28.26 | -11.94 | 1775 | 2422 | -0.99 |
| P40-01-10 | 0.282276 | 0.000008 | 0.000399 | 0.000002 | 0.014089 | 0.000014 | 609 | -17.56 | -4.31 | 1356 | 1831 | -0.99 |
| P40-01-11 | 0.281852 | 0.000007 | 0.000576 | 0.000000 | 0.021480 | 0.000070 | 840 | -32.53 | -14.31 | 1944 | 2640 | -0.98 |
| P40-01-13 | 0.281894 | 0.000008 | 0.000335 | 0.000001 | 0.013381 | 0.000063 | 1010 | -31.06 | -8.96 | 1875 | 2437 | -0.99 |
| P40-01-17 | 0.282185 | 0.000008 | 0.000737 | 0.000009 | 0.025050 | 0.000326 | 563 | -20.77 | -8.64 | 1494 | 2069 | -0.98 |
| P40-01-18 | 0.281395 | 0.000008 | 0.000768 | 0.000002 | 0.027018 | 0.000095 | 2221 | -48.70 | -0.15 | 2577 | 2817 | -0.98 |
| P40-01-20 | 0.281585 | 0.000008 | 0.000476 | 0.000003 | 0.016561 | 0.000157 | 1776 | -41.99 | -2.98 | 2302 | 2654 | -0.99 |
| P40-01-23 | 0.282055 | 0.000008 | 0.000663 | 0.000006 | 0.025103 | 0.000138 | 938 | -25.35 | -5.03 | 1669 | 2133 | -0.98 |
| P40-01-29 | 0.281534 | 0.000010 | 0.001417 | 0.000021 | 0.052938 | 0.000611 | 753 | -43.79 | -27.93 | 2430 | 3416 | -0.96 |
| P40-01-30 | 0.282004 | 0.000009 | 0.000412 | 0.000001 | 0.014152 | 0.000099 | 769 | -27.17 | -10.41 | 1729 | 2340 | -0.99 |
| P40-01-32 | 0.281283 | 0.000008 | 0.000202 | 0.000004 | 0.006766 | 0.000171 | 2540 | -52.65 | 4.04 | 2689 | 2795 | -0.99 |
| P40-01-33 | 0.281198 | 0.000010 | 0.000831 | 0.000004 | 0.027456 | 0.000161 | 2566 | -55.66 | 0.51 | 2848 | 3041 | -0.97 |
| P40-01-34 | 0.280972 | 0.000009 | 0.000489 | 0.000006 | 0.018291 | 0.000362 | 2428 | -63.66 | -10.07 | 3126 | 3605 | -0.99 |
| P40-01-35 | 0.281738 | 0.000010 | 0.000885 | 0.000023 | 0.030641 | 0.000752 | 1755 | -36.55 | 1.52 | 2116 | 2351 | -0.97 |
| P40-01-38 | 0.282122 | 0.000009 | 0.001010 | 0.000005 | 0.037137 | 0.000065 | 1120 | -22.99 | 1.08 | 1592 | 1888 | -0.97 |
| P40-01-42 | 0.281912 | 0.000008 | 0.000733 | 0.000002 | 0.027761 | 0.000164 | 928 | -30.43 | -10.39 | 1870 | 2463 | -0.98 |
| P40-01-46 | 0.282086 | 0.000008 | 0.000846 | 0.000022 | 0.031632 | 0.000982 | 964 | -24.25 | -3.47 | 1634 | 2055 | -0.97 |
| P40-01-47 | 0.282394 | 0.000009 | 0.001049 | 0.000003 | 0.039206 | 0.000229 | 910 | -13.36 | 6.13 | 1213 | 1402 | -0.97 |
| P40-01-48 | 0.282248 | 0.000010 | 0.001125 | 0.000012 | 0.039968 | 0.000508 | 737 | -18.52 | -2.82 | 1420 | 1837 | -0.97 |
| P40-01-50 | 0.282037 | 0.000010 | 0.001084 | 0.000035 | 0.041495 | 0.001357 | 968 | -26.01 | -5.31 | 1714 | 2174 | -0.97 |
| P40-01-53 | 0.281890 | 0.000008 | 0.000336 | 0.000001 | 0.012204 | 0.000036 | 918 | -31.19 | -11.12 | 1880 | 2501 | -0.99 |
| P40-01-54 | 0.281936 | 0.000008 | 0.000505 | 0.000001 | 0.017315 | 0.000037 | 1583 | -29.55 | 5.16 | 1825 | 1986 | -0.98 |
| P40-01-56 | 0.282064 | 0.000008 | 0.000894 | 0.000004 | 0.033755 | 0.000240 | 945 | -25.04 | -4.71 | 1667 | 2119 | -0.97 |
| P40-01-58 | 0.282477 | 0.000010 | 0.000700 | 0.000002 | 0.025983 | 0.000112 | 602 | -10.44 | 2.54 | 1088 | 1391 | -0.98 |
| P40-01-60 | 0.281901 | 0.000008 | 0.000224 | 0.000001 | 0.009171 | 0.000046 | 935 | -30.80 | -10.28 | 1860 | 2462 | -0.99 |
| P40-01-62 | 0.281339 | 0.000008 | 0.000212 | 0.000002 | 0.007331 | 0.000054 | 2456 | -50.69 | 4.06 | 2616 | 2729 | -0.99 |
| P40-01-63 | 0.282130 | 0.000009 | 0.001099 | 0.000008 | 0.041788 | 0.000184 | 980 | -22.70 | -1.74 | 1584 | 1958 | -0.97 |
| P40-01-65 | 0.282077 | 0.000008 | 0.000304 | 0.000010 | 0.012641 | 0.000380 | 941 | -24.57 | -3.97 | 1624 | 2068 | -0.99 |
| P40-01-66 | 0.281983 | 0.000009 | 0.000785 | 0.000000 | 0.026895 | 0.000079 | 1050 | -27.89 | -5.21 | 1774 | 2232 | -0.98 |
| P40-01-69 | 0.281880 | 0.000008 | 0.001015 | 0.000003 | 0.037936 | 0.000127 | 1484 | -31.56 | 0.42 | 1928 | 2212 | -0.97 |
| P40-01-73 | 0.282135 | 0.000008 | 0.000608 | 0.000012 | 0.022796 | 0.000610 | 534 | -22.52 | -10.98 | 1557 | 2193 | -0.98 |
| P40-01-74 | 0.281964 | 0.000008 | 0.000590 | 0.000005 | 0.021343 | 0.000110 | 784 | -28.58 | -11.61 | 1792 | 2427 | -0.98 |
| P40-01-76 | 0.282212 | 0.000008 | 0.001546 | 0.000006 | 0.055677 | 0.000152 | 962 | -19.82 | 0.46 | 1488 | 1804 | -0.95 |
| P40-01-82 | 0.281994 | 0.000008 | 0.000687 | 0.000006 | 0.025684 | 0.000179 | 747 | -27.50 | -11.38 | 1754 | 2384 | -0.98 |
| P40-01-85 | 0.282003 | 0.000008 | 0.000545 | 0.000004 | 0.019884 | 0.000122 | 912 | -27.21 | -7.39 | 1737 | 2262 | -0.98 |
| **Sample P43-01: Late Sinian sandstone from Cathaysia block (N26°37′5.36″, E114°32′19.26″)** | | | | | | | | | | | | |
| P43-01-03 | 0.282123 | 0.000009 | 0.000684 | 0.000007 | 0.024461 | 0.000243 | 936 | -22.95 | -2.68 | 1577 | 1983 | -0.98 |
| P43-01-08 | 0.282372 | 0.000009 | 0.001094 | 0.000005 | 0.032371 | 0.000140 | 994 | -14.14 | 7.15 | 1246 | 1402 | -0.97 |
| P43-01-09 | 0.281248 | 0.000008 | 0.001636 | 0.000017 | 0.058789 | 0.000727 | 2431 | -53.91 | -2.08 | 2841 | 3103 | -0.95 |
| P43-01-12 | 0.282170 | 0.000008 | 0.000679 | 0.000002 | 0.021234 | 0.000047 | 935 | -21.28 | -1.03 | 1512 | 1878 | -0.98 |
| P43-01-14 | 0.282016 | 0.000008 | 0.001133 | 0.000059 | 0.036629 | 0.002005 | 818 | -26.72 | -9.29 | 1744 | 2308 | -0.97 |
| P43-01-15 | 0.282174 | 0.000008 | 0.001261 | 0.000032 | 0.044745 | 0.001226 | 827 | -21.16 | -3.60 | 1530 | 1956 | -0.96 |
| P43-01-20 | 0.282005 | 0.000009 | 0.000477 | 0.000002 | 0.015647 | 0.000096 | 785 | -27.12 | -10.05 | 1730 | 2330 | -0.99 |
| P43-01-24 | 0.281192 | 0.000008 | 0.000276 | 0.000001 | 0.008557 | 0.000023 | 2450 | -55.88 | -1.38 | 2816 | 3073 | -0.99 |
| P43-01-26 | 0.282480 | 0.000011 | 0.000938 | 0.000020 | 0.030578 | 0.000672 | 956 | -10.33 | 10.24 | 1090 | 1174 | -0.97 |
| P43-01-29 | 0.282096 | 0.000008 | 0.000557 | 0.000028 | 0.020961 | 0.001037 | 914 | -23.89 | -4.04 | 1608 | 2052 | -0.98 |
| P43-01-31 | 0.281767 | 0.000008 | 0.000456 | 0.000008 | 0.015192 | 0.000247 | 1461 | -35.55 | -3.54 | 2054 | 2445 | -0.99 |
| P43-01-34 | 0.281962 | 0.000008 | 0.000790 | 0.000005 | 0.028128 | 0.000219 | 970 | -28.64 | -7.71 | 1803 | 2327 | -0.98 |
| P43-01-37 | 0.282166 | 0.000008 | 0.000276 | 0.000001 | 0.009265 | 0.000052 | 860 | -21.41 | -2.58 | 1501 | 1917 | -0.99 |
| P43-01-38 | 0.280995 | 0.000008 | 0.000833 | 0.000004 | 0.027185 | 0.000165 | 2662 | -62.85 | -4.55 | 3122 | 3437 | -0.97 |
| P43-01-40 | 0.282524 | 0.000008 | 0.000756 | 0.000005 | 0.025052 | 0.000205 | 637 | -8.78 | 4.96 | 1023 | 1264 | -0.98 |
| P43-01-41 | 0.282211 | 0.000008 | 0.000587 | 0.000004 | 0.014463 | 0.000134 | 837 | -19.84 | -1.68 | 1452 | 1843 | -0.98 |
| P43-01-44 | 0.282056 | 0.000010 | 0.001106 | 0.000018 | 0.040076 | 0.000677 | 939 | -25.31 | -5.25 | 1687 | 2148 | -0.97 |
| P43-01-45 | 0.282268 | 0.000009 | 0.001255 | 0.000008 | 0.042379 | 0.000347 | 964 | -17.82 | 2.69 | 1397 | 1663 | -0.96 |
| P43-01-47 | 0.281991 | 0.000009 | 0.000653 | 0.000007 | 0.021915 | 0.000291 | 779 | -27.63 | -10.78 | 1758 | 2372 | -0.98 |
| P43-01-48 | 0.282119 | 0.000008 | 0.000517 | 0.000004 | 0.017814 | 0.000120 | 945 | -23.08 | -2.52 | 1575 | 1980 | -0.98 |
| P43-01-50 | 0.281192 | 0.000008 | 0.000270 | 0.000009 | 0.009164 | 0.000285 | 2506 | -55.88 | -0.11 | 2816 | 3034 | -0.99 |
| P43-01-53 | 0.281820 | 0.000009 | 0.000650 | 0.000007 | 0.020551 | 0.000174 | 1083 | -33.66 | -10.16 | 1991 | 2570 | -0.98 |
| P43-01-54 | 0.282107 | 0.000007 | 0.000680 | 0.000002 | 0.022336 | 0.000069 | 1117 | -23.50 | 0.73 | 1598 | 1907 | -0.98 |
| P43-01-55 | 0.281744 | 0.000008 | 0.000680 | 0.000003 | 0.023624 | 0.000112 | 1366 | -36.34 | -6.66 | 2096 | 2569 | -0.98 |
| P43-01-57 | 0.282091 | 0.000007 | 0.000993 | 0.000021 | 0.034749 | 0.000899 | 558 | -24.08 | -12.17 | 1634 | 2286 | -0.97 |
| P43-01-59 | 0.280753 | 0.000008 | 0.000458 | 0.000008 | 0.015337 | 0.000249 | 2609 | -71.40 | -13.68 | 3414 | 3972 | -0.99 |
| P43-01-60 | 0.282260 | 0.000008 | 0.000686 | 0.000001 | 0.022570 | 0.000038 | 543 | -18.11 | -6.39 | 1388 | 1912 | -0.98 |
| P43-01-63 | 0.281957 | 0.000008 | 0.001337 | 0.000008 | 0.046102 | 0.000307 | 716 | -28.83 | -13.69 | 1837 | 2504 | -0.96 |
| P43-01-66 | 0.282215 | 0.000009 | 0.000986 | 0.000004 | 0.034223 | 0.000188 | 959 | -19.70 | 0.89 | 1462 | 1774 | -0.97 |
| P43-01-69 | 0.282003 | 0.000010 | 0.000731 | 0.000007 | 0.024659 | 0.000116 | 738 | -27.21 | -11.30 | 1745 | 2372 | -0.98 |
| P43-01-71 | 0.281088 | 0.000008 | 0.000383 | 0.000001 | 0.013549 | 0.000070 | 2329 | -59.56 | -8.02 | 2963 | 3400 | -0.99 |
| P43-01-78 | 0.281155 | 0.000008 | 0.000598 | 0.000003 | 0.020566 | 0.000131 | 2492 | -57.19 | -2.30 | 2889 | 3163 | -0.98 |
| P43-01-79 | 0.281642 | 0.000008 | 0.000610 | 0.000004 | 0.020562 | 0.000168 | 1791 | -39.96 | -0.78 | 2232 | 2526 | -0.98 |
| P43-01-84 | 0.281890 | 0.000009 | 0.000552 | 0.000009 | 0.019451 | 0.000373 | 543 | -31.19 | -19.44 | 1891 | 2728 | -0.98 |
| P43-01-85 | 0.281215 | 0.000008 | 0.000735 | 0.000007 | 0.025643 | 0.000224 | 2520 | -55.05 | 0.27 | 2818 | 3021 | -0.98 |
| P43-01-86 | 0.282136 | 0.000008 | 0.000156 | 0.000004 | 0.005012 | 0.000093 | 890 | -22.50 | -2.93 | 1538 | 1963 | -1.00 |
| P43-01-87 | 0.281634 | 0.000010 | 0.000710 | 0.000006 | 0.022301 | 0.000230 | 1692 | -40.26 | -3.40 | 2249 | 2615 | -0.98 |
| P43-01-89 | 0.281793 | 0.000009 | 0.001039 | 0.000007 | 0.035289 | 0.000200 | 762 | -34.60 | -18.35 | 2048 | 2830 | -0.97 |
| P43-01-90 | 0.282476 | 0.000010 | 0.000478 | 0.000003 | 0.016793 | 0.000133 | 655 | -10.47 | 3.77 | 1082 | 1354 | -0.99 |
